# Supplementary material
Source: publisher site journal article supplement (https://www.spandidos-publications.com/7464/downloadSupplementary)
Supplement: Supplementary file 1 [file downloadSupplementary]

## Sheet: tmp
Table SV. Differentially expressed genes between the gastric cancer and normal tissues from GSE26942 cohort.
Genes	logFC	t	P.Value	adj.P.Val	B	Changea
EXOC6B	-2.62191	-9.91027	2.67466e-19	5.13026e-15	32.8108	Down-regulated
MMP24	-2.39553	-9.55205	3.07526e-18	2.94933e-14	30.484	Down-regulated
AQP4	-2.05884	-8.56671	2.10195e-15	1.22563e-11	24.2643	Down-regulated
PTGDR2	-1.69244	-8.53644	2.55592e-15	1.22563e-11	24.078	Down-regulated
ADH7	-2.05454	-8.19387	2.28344e-14	8.75974e-11	21.9918	Down-regulated
LETMD1	-0.890663	-7.92894	1.20443e-13	3.85036e-10	20.4082	Not-significant
ESRRG	-3.47917	-7.74441	3.77175e-13	9.07982e-10	19.3215	Down-regulated
PM20D1	-0.738196	-7.74375	3.787e-13	9.07982e-10	19.3177	Not-significant
PDGFD	-1.76155	-7.57919	1.03546e-12	2.01503e-09	18.3604	Down-regulated
MRGPRD	-3.32294	-7.56368	1.1377e-12	2.01503e-09	18.2708	Down-regulated
CHRD	-3.19917	-7.56111	1.15559e-12	2.01503e-09	18.256	Down-regulated
GLOD4	-1.0875	-7.51644	1.51479e-12	2.42126e-09	17.9985	Down-regulated
HHIPL1	-0.775872	-7.4859	1.82178e-12	2.68797e-09	17.8229	Not-significant
ELMOD3	-0.83715	-7.46967	2.00914e-12	2.75267e-09	17.7298	Not-significant
SLC2A12	-1.49703	-7.32969	4.65131e-12	5.94778e-09	16.9313	Down-regulated
HMGCL	-0.876932	-7.31393	5.10922e-12	6.125e-09	16.8421	Not-significant
TRIM50	-1.94511	-7.26538	6.81928e-12	7.69415e-09	16.5675	Down-regulated
CPA2	-3.48227	-7.24273	7.79971e-12	8.31146e-09	16.4398	Down-regulated
NFE2L2	-1.26692	-7.13538	1.4693e-11	1.4833e-08	15.8378	Down-regulated
ALDH6A1	-1.44103	-7.1069	1.73651e-11	1.6654e-08	15.679	Down-regulated
LIFR	-1.5622	-7.09785	1.83104e-11	1.67244e-08	15.6286	Down-regulated
MFSD4A	-1.51953	-7.06805	2.17967e-11	1.84217e-08	15.463	Down-regulated
SH3GL2	-1.84585	-7.06576	2.20895e-11	1.84217e-08	15.4503	Down-regulated
RAB11FIP2	-1.49226	-6.95232	4.27132e-11	3.40755e-08	14.8239	Down-regulated
PRDM16-DT	-1.51789	-6.94557	4.44131e-11	3.40755e-08	14.7868	Down-regulated
ATP4B	-5.0098	-6.82337	8.96837e-11	6.61624e-08	14.1194	Down-regulated
ETNPPL	-1.45463	-6.79495	1.0549e-10	7.49406e-08	13.9653	Down-regulated
ADAM28	-1.33661	-6.76067	1.28241e-10	8.78499e-08	13.7799	Down-regulated
APOBEC2	-1.91382	-6.74599	1.39402e-10	9.22021e-08	13.7007	Down-regulated
KCNJ16	-2.51409	-6.70796	1.72951e-10	1.10579e-07	13.4961	Down-regulated
STX12	-1.02192	-6.63517	2.60795e-10	1.61365e-07	13.1064	Down-regulated
GCNT2	-1.51564	-6.60944	3.01335e-10	1.80622e-07	12.9693	Down-regulated
CLIC6	-3.11124	-6.58935	3.37257e-10	1.96028e-07	12.8625	Down-regulated
PBX1	-0.955992	-6.54732	4.26517e-10	2.40618e-07	12.6398	Down-regulated
KCNE2	-3.52662	-6.53332	4.61127e-10	2.52711e-07	12.5658	Down-regulated
MTMR3	-0.72061	-6.52422	4.85091e-10	2.54597e-07	12.5177	Not-significant
CCDC121	-1.80523	-6.52005	4.96494e-10	2.54597e-07	12.4957	Down-regulated
DGKD	-1.45572	-6.51721	5.04388e-10	2.54597e-07	12.4808	Down-regulated
CKM	-1.69192	-6.49734	5.63254e-10	2.76164e-07	12.3761	Down-regulated
INSRR	-0.421855	-6.49334	5.75912e-10	2.76164e-07	12.355	Not-significant
PHYKPL	-0.790182	-6.47853	6.25178e-10	2.92477e-07	12.2772	Not-significant
BTBD3	-1.00652	-6.4605	6.9078e-10	3.14485e-07	12.1826	Down-regulated
PDE4A	-0.511838	-6.45681	7.05014e-10	3.14485e-07	12.1633	Not-significant
SLC30A9	-0.753729	-6.43081	8.1384e-10	3.54779e-07	12.0272	Not-significant
POSTN	-1.97548	-6.39194	1.008e-09	4.29655e-07	11.8244	Down-regulated
GCLC	-0.806906	-6.37779	1.08941e-09	4.54261e-07	11.7508	Not-significant
ECI2	-1.17541	-6.3521	1.25402e-09	5.11772e-07	11.6175	Down-regulated
PRDM16	-1.41251	-6.31184	1.56228e-09	6.14406e-07	11.4093	Down-regulated
MYRIP	-1.3702	-6.31099	1.56957e-09	6.14406e-07	11.4049	Down-regulated
FBXW7	-0.854936	-6.26391	2.0273e-09	7.71124e-07	11.1625	Not-significant
DERL3	-1.04277	-6.26182	2.05033e-09	7.71124e-07	11.1518	Down-regulated
IRF4	-1.04385	-6.24642	2.22877e-09	8.22117e-07	11.0728	Down-regulated
ATP11B	-1.25102	-6.23872	2.3236e-09	8.40925e-07	11.0333	Down-regulated
CBLIF	-5.05069	-6.21883	2.58709e-09	9.10229e-07	10.9316	Down-regulated
FAM189A2	-1.55754	-6.2172	2.61001e-09	9.10229e-07	10.9233	Down-regulated
FGA	-2.08694	-6.2109	2.70018e-09	9.24859e-07	10.8911	Down-regulated
XYLT2	-1.59142	-6.1405	3.94137e-09	1.32631e-06	10.5332	Down-regulated
TBC1D14	-1.09483	-6.1136	4.55088e-09	1.50501e-06	10.3971	Down-regulated
SLC26A9	-1.798	-6.10622	4.73364e-09	1.53892e-06	10.3598	Down-regulated
FAHD2B	-0.888705	-6.09421	5.04662e-09	1.57747e-06	10.2993	Not-significant
SUCLG2	-1.06844	-6.09172	5.11394e-09	1.57747e-06	10.2867	Down-regulated
PIK3C2G	-1.39759	-6.09054	5.14617e-09	1.57747e-06	10.2808	Down-regulated
FAM214A	-0.992818	-6.08927	5.1812e-09	1.57747e-06	10.2744	Down-regulated
ATP4A	-4.83318	-6.07699	5.53078e-09	1.65759e-06	10.2126	Down-regulated
FUT9	-1.50836	-6.06482	5.90036e-09	1.74115e-06	10.1514	Down-regulated
CCDC105	0.281298	6.04725	6.47638e-09	1.88217e-06	10.0633	Not-significant
APPL1	-0.721286	-6.03942	6.75064e-09	1.9326e-06	10.0241	Not-significant
SH2B1	-0.738479	-6.0364	6.85969e-09	1.93494e-06	10.0089	Not-significant
SACM1L	-0.866577	-6.01726	7.5899e-09	2.10988e-06	9.91328	Not-significant
OPRM1	-0.422253	-6.01277	7.77213e-09	2.12967e-06	9.89085	Not-significant
GHRL	-3.36912	-5.99852	8.37865e-09	2.26353e-06	9.8198	Down-regulated
UBE4A	-0.739031	-5.98552	8.97285e-09	2.39039e-06	9.75502	Not-significant
ATXN7L3B	-1.04118	-5.9765	9.40873e-09	2.47218e-06	9.71018	Down-regulated
KIT	-1.62748	-5.95966	1.02789e-08	2.66432e-06	9.62656	Down-regulated
MBIP	-0.902105	-5.95133	1.07381e-08	2.74624e-06	9.58525	Down-regulated
FAR1	-1.0962	-5.94798	1.09279e-08	2.75801e-06	9.56869	Down-regulated
PP7080	-2.40565	-5.94517	1.10901e-08	2.7626e-06	9.55476	Down-regulated
NNT	-1.11535	-5.93394	1.17617e-08	2.89029e-06	9.4992	Down-regulated
PMM1	-1.0025	-5.93164	1.19041e-08	2.89029e-06	9.48782	Down-regulated
MPC1	-0.920182	-5.92825	1.21176e-08	2.90535e-06	9.47102	Down-regulated
HADH	-0.94811	-5.92374	1.24061e-08	2.9378e-06	9.44879	Down-regulated
SMAP1	-0.761601	-5.91632	1.28967e-08	3.01672e-06	9.41214	Not-significant
FNDC3A	-0.837908	-5.91374	1.3072e-08	3.0209e-06	9.39938	Not-significant
DRD5	-1.10323	-5.90857	1.34293e-08	3.06652e-06	9.3739	Down-regulated
INSIG1	-1.32122	-5.90302	1.38235e-08	3.10011e-06	9.34656	Down-regulated
CKMT2	-1.76999	-5.90197	1.38996e-08	3.10011e-06	9.34137	Down-regulated
ANGPTL3	-0.824166	-5.88709	1.50198e-08	3.28305e-06	9.26814	Not-significant
CEP350	-0.735283	-5.8864	1.5074e-08	3.28305e-06	9.26474	Not-significant
ACO1	-0.817142	-5.88438	1.52334e-08	3.28305e-06	9.25481	Not-significant
PLPP6	-0.952631	-5.87184	1.62596e-08	3.46528e-06	9.19322	Down-regulated
CCKBR	-2.1009	-5.84826	1.83762e-08	3.87334e-06	9.07762	Down-regulated
NTN4	-1.3615	-5.838	1.93789e-08	4.04029e-06	9.02744	Down-regulated
RALGAPA1	-0.643584	-5.83334	1.98521e-08	4.09443e-06	9.00466	Not-significant
FOXP4	-0.777573	-5.82346	2.08925e-08	4.26318e-06	8.95642	Not-significant
SIDT2	-1.10136	-5.81765	2.15284e-08	4.32631e-06	8.92811	Down-regulated
ALCAM	-1.31325	-5.81653	2.1653e-08	4.32631e-06	8.92266	Down-regulated
ADHFE1	-1.46735	-5.80101	2.34585e-08	4.63873e-06	8.84703	Down-regulated
USP16	-0.680786	-5.77668	2.6587e-08	5.20373e-06	8.72884	Not-significant
WWP1	-0.681851	-5.77323	2.70629e-08	5.24337e-06	8.71209	Not-significant
FBP2	-1.40272	-5.75145	3.02619e-08	5.80454e-06	8.60663	Down-regulated
WDR37	-0.701237	-5.74007	3.20785e-08	6.09206e-06	8.55161	Not-significant
SCNN1G	-1.11156	-5.72404	3.48181e-08	6.5475e-06	8.47427	Down-regulated
GATD3	-0.578791	-5.71996	3.55494e-08	6.62012e-06	8.45466	Not-significant
CHIA	-2.02298	-5.70419	3.8527e-08	7.10565e-06	8.37876	Down-regulated
PGA3	-4.99689	-5.69771	3.98199e-08	7.25865e-06	8.34762	Down-regulated
MTARC2	-1.09405	-5.69505	4.03633e-08	7.25865e-06	8.33483	Down-regulated
SIGLEC11	-1.04714	-5.69442	4.04919e-08	7.25865e-06	8.33183	Down-regulated
GPBP1L1	-0.933097	-5.68807	4.18221e-08	7.3917e-06	8.30134	Down-regulated
METTL7A	-1.76906	-5.68721	4.20049e-08	7.3917e-06	8.29723	Down-regulated
KLHDC2	-0.747856	-5.68094	4.33651e-08	7.56168e-06	8.26716	Not-significant
PPCS	-0.715012	-5.67056	4.57118e-08	7.89909e-06	8.21745	Not-significant
GLUL	-0.859274	-5.66734	4.64643e-08	7.95743e-06	8.20205	Not-significant
ARHGAP18	-1.04554	-5.66455	4.71275e-08	7.99959e-06	8.18868	Down-regulated
RAF1	-0.7377	-5.66084	4.80214e-08	8.07982e-06	8.17096	Not-significant
COQ6	-0.627605	-5.65793	4.87353e-08	8.08005e-06	8.15704	Not-significant
SNX24	-1.07584	-5.65741	4.88653e-08	8.08005e-06	8.15453	Down-regulated
DNM3	-0.955425	-5.62717	5.69374e-08	9.33433e-06	8.01035	Down-regulated
RNF14	-0.628132	-5.62104	5.87263e-08	9.54601e-06	7.98118	Not-significant
CHP1	-1.21303	-5.61412	6.08128e-08	9.74899e-06	7.94826	Down-regulated
TESK2	-0.662281	-5.61354	6.09916e-08	9.74899e-06	7.9455	Not-significant
OFD1	-0.752828	-5.60931	6.23056e-08	9.87672e-06	7.9254	Not-significant
LIPF	-4.98914	-5.59879	6.56935e-08	1.03284e-05	7.87548	Down-regulated
CYB5R1	-1.22502	-5.58214	7.14249e-08	1.11382e-05	7.79664	Down-regulated
DNER	-1.52544	-5.56938	7.61468e-08	1.17788e-05	7.7363	Down-regulated
CAPN13	-1.98191	-5.56664	7.71968e-08	1.18457e-05	7.72339	Down-regulated
EQTN	-0.417951	-5.56061	7.95638e-08	1.20493e-05	7.69493	Not-significant
CCNG1	-0.999756	-5.56007	7.97801e-08	1.20493e-05	7.69237	Down-regulated
KYAT3	-0.705737	-5.55844	8.04331e-08	1.2053e-05	7.68469	Not-significant
IMMT	-0.765946	-5.54209	8.72876e-08	1.28716e-05	7.60762	Not-significant
TMEM116	-0.797776	-5.54076	8.78675e-08	1.28716e-05	7.60138	Not-significant
ZNF385B	-1.45724	-5.54067	8.7909e-08	1.28716e-05	7.60094	Down-regulated
MCCC1	-0.908936	-5.533	9.13383e-08	1.32034e-05	7.56488	Down-regulated
LTN1	-0.691732	-5.53218	9.17135e-08	1.32034e-05	7.56102	Not-significant
SSR4P1	-0.686175	-5.53103	9.22399e-08	1.32034e-05	7.55563	Not-significant
MICALL1	-0.960834	-5.52598	9.45943e-08	1.34401e-05	7.53188	Down-regulated
ME3	-0.92963	-5.51697	9.89378e-08	1.39539e-05	7.48959	Down-regulated
CKB	-2.39481	-5.51435	1.00234e-07	1.40335e-05	7.47733	Down-regulated
TLE5	-0.853609	-5.50378	1.05648e-07	1.46843e-05	7.42777	Not-significant
GSTA4	-1.12405	-5.50113	1.07049e-07	1.47719e-05	7.41537	Down-regulated
UBL3	-1.04928	-5.49131	1.12397e-07	1.53992e-05	7.36945	Down-regulated
RAP1GAP2	-1.19705	-5.48038	1.1866e-07	1.6142e-05	7.31838	Down-regulated
SECISBP2L	-0.858567	-5.47576	1.21405e-07	1.63991e-05	7.29684	Not-significant
SPTSSB	-1.13898	-5.46838	1.25921e-07	1.68901e-05	7.26245	Down-regulated
ZNF517	0.235511	5.45067	1.37446e-07	1.8308e-05	7.17999	Not-significant
KIAA1191	-0.808711	-5.42105	1.59046e-07	2.10391e-05	7.04259	Not-significant
SMIM11	-1.05937	-5.41796	1.61482e-07	2.11059e-05	7.02828	Down-regulated
MARF1	-0.685312	-5.41762	1.61752e-07	2.11059e-05	7.02671	Not-significant
SOSTDC1	-2.10452	-5.41417	1.64517e-07	2.13217e-05	7.01075	Down-regulated
PPP2R5A	-0.743852	-5.40679	1.70588e-07	2.196e-05	6.97665	Not-significant
FAM104A	-0.590282	-5.402	1.74643e-07	2.23322e-05	6.95455	Not-significant
PTGER3	-1.3088	-5.40011	1.76276e-07	2.23441e-05	6.94579	Down-regulated
ANKMY2	-0.945828	-5.3992	1.77066e-07	2.23441e-05	6.94158	Down-regulated
PABPC4	-0.988875	-5.39766	1.78409e-07	2.23664e-05	6.93447	Down-regulated
RSAD1	-0.686024	-5.38607	1.88826e-07	2.34468e-05	6.88107	Not-significant
RAB5C	-0.835828	-5.38538	1.89471e-07	2.34468e-05	6.87786	Not-significant
PLPP3	-1.2811	-5.37714	1.97266e-07	2.42548e-05	6.83993	Down-regulated
ETFRF1	-0.857539	-5.37528	1.99063e-07	2.43199e-05	6.8314	Not-significant
FMO4	-0.776568	-5.37319	2.01114e-07	2.4415e-05	6.82175	Not-significant
C12orf40	0.260603	5.36593	2.08374e-07	2.51373e-05	6.78839	Not-significant
ERMAP	-0.566576	-5.36279	2.11591e-07	2.53658e-05	6.77398	Not-significant
NDUFA10	-0.713212	-5.35747	2.17157e-07	2.58713e-05	6.74955	Not-significant
COBLL1	-1.13374	-5.353	2.21944e-07	2.62785e-05	6.72904	Down-regulated
DGLUCY	-0.978174	-5.34929	2.2599e-07	2.65934e-05	6.71205	Down-regulated
HSDL2	-0.725293	-5.34713	2.28383e-07	2.67111e-05	6.70214	Not-significant
DCAF6	-0.596562	-5.33968	2.36818e-07	2.75298e-05	6.66803	Not-significant
PUM2	-0.606259	-5.32337	2.56356e-07	2.96215e-05	6.59348	Not-significant
OSBPL7	-1.55044	-5.3172	2.6416e-07	3.03404e-05	6.56528	Down-regulated
PIGV	-0.67515	-5.30905	2.74809e-07	3.13756e-05	6.52812	Not-significant
CACHD1	-0.838606	-5.30759	2.76757e-07	3.14111e-05	6.52148	Not-significant
NECAB3	-0.66441	-5.30344	2.82373e-07	3.186e-05	6.50259	Not-significant
PLCXD3	-1.27774	-5.29718	2.91061e-07	3.25955e-05	6.4741	Down-regulated
KAT2B	-0.628507	-5.29631	2.92291e-07	3.25955e-05	6.47014	Not-significant
PTGR1	-1.45476	-5.29459	2.94743e-07	3.26789e-05	6.46228	Down-regulated
PSCA	-3.45788	-5.28498	3.0876e-07	3.40364e-05	6.41861	Down-regulated
PPP1CB	-0.810712	-5.28134	3.14232e-07	3.44417e-05	6.40209	Not-significant
PHKB	-0.646336	-5.27382	3.25844e-07	3.55114e-05	6.36799	Not-significant
OR51B2	0.267895	5.26445	3.40896e-07	3.6942e-05	6.32554	Not-significant
HDHD2	-0.638653	-5.26183	3.45238e-07	3.72023e-05	6.31365	Not-significant
LOC100240735	-0.994363	-5.25472	3.57252e-07	3.81145e-05	6.28151	Down-regulated
CDK18	-0.983873	-5.25362	3.59156e-07	3.81145e-05	6.27651	Down-regulated
PGRMC2	-0.693669	-5.25332	3.59664e-07	3.81145e-05	6.27518	Not-significant
TNRC6B	-0.773362	-5.25216	3.61673e-07	3.81168e-05	6.26995	Not-significant
C1orf43	-0.64437	-5.24918	3.66902e-07	3.84566e-05	6.25646	Not-significant
LINC02381	-1.85308	-5.22647	4.09158e-07	4.26525e-05	6.15404	Down-regulated
DHRS7	-1.12868	-5.21794	4.26239e-07	4.41929e-05	6.11562	Down-regulated
HDC	-1.97761	-5.2125	4.37476e-07	4.51141e-05	6.09118	Down-regulated
GRAMD1C	-0.791483	-5.21123	4.40132e-07	4.51453e-05	6.08549	Not-significant
SLC9A2	-1.82119	-5.20663	4.49917e-07	4.59035e-05	6.06484	Down-regulated
OR2S2	0.277114	5.2024	4.59125e-07	4.65951e-05	6.04582	Not-significant
SPG11	-0.758961	-5.1993	4.6596e-07	4.69291e-05	6.03194	Not-significant
CLCNKA	-1.86772	-5.1987	4.67309e-07	4.69291e-05	6.02922	Down-regulated
IBTK	-0.92658	-5.19416	4.77541e-07	4.77069e-05	6.00888	Down-regulated
ENPP6	-0.598705	-5.19079	4.85288e-07	4.82296e-05	5.99377	Not-significant
CHPT1	-1.12105	-5.18644	4.95449e-07	4.89856e-05	5.97431	Down-regulated
DELE1	-0.582312	-5.17911	5.1306e-07	5.03317e-05	5.94151	Not-significant
RPL3	-0.336009	-5.178	5.15783e-07	5.03317e-05	5.93654	Not-significant
SLTM	-0.552496	-5.17719	5.1776e-07	5.03317e-05	5.93295	Not-significant
TMEM171	-1.41569	-5.17475	5.23819e-07	5.03317e-05	5.92203	Down-regulated
GOT1	-0.877188	-5.17449	5.2448e-07	5.03317e-05	5.92084	Not-significant
TLE4	-0.880866	-5.17435	5.24808e-07	5.03317e-05	5.92025	Not-significant
GMPR2	-0.551473	-5.17215	5.30331e-07	5.04439e-05	5.91042	Not-significant
POU2AF1	-1.50774	-5.1717	5.31467e-07	5.04439e-05	5.90842	Down-regulated
SON	-0.639967	-5.17076	5.33868e-07	5.04439e-05	5.90418	Not-significant
WDR59	-0.546173	-5.16871	5.39083e-07	5.06451e-05	5.89506	Not-significant
CCNJL	-0.381767	-5.16786	5.41278e-07	5.06451e-05	5.89124	Not-significant
IRX3	-1.86724	-5.16208	5.56345e-07	5.18022e-05	5.86547	Down-regulated
C5	-1.17234	-5.15175	5.84305e-07	5.41428e-05	5.81944	Down-regulated
CPEB2	-0.661374	-5.14085	6.15306e-07	5.65626e-05	5.77091	Not-significant
ARSD	-1.24652	-5.1405	6.16318e-07	5.65626e-05	5.76937	Down-regulated
PELI2	-1.05404	-5.13796	6.23796e-07	5.69764e-05	5.75805	Down-regulated
MYO10	-1.00326	-5.13123	6.43982e-07	5.85414e-05	5.72816	Down-regulated
PDLIM7	-0.679171	-5.11922	6.81599e-07	6.16687e-05	5.67489	Not-significant
TRIM41	-0.592337	-5.11725	6.87953e-07	6.1757e-05	5.66618	Not-significant
UQCRC1	-0.866494	-5.11693	6.89015e-07	6.1757e-05	5.66473	Not-significant
ACSF2	-0.846202	-5.1156	6.93344e-07	6.1856e-05	5.65886	Not-significant
TNFSF11	-1.10733	-5.11358	6.99973e-07	6.21582e-05	5.64993	Down-regulated
TMEM18	-0.52779	-5.10954	7.13465e-07	6.30644e-05	5.63202	Not-significant
MYRF	-1.32864	-5.10544	7.27372e-07	6.39987e-05	5.6139	Down-regulated
GATA6	-0.582028	-5.1027	7.3683e-07	6.45349e-05	5.60178	Not-significant
TRAPPC11	-0.643988	-5.0932	7.7054e-07	6.71042e-05	5.55982	Not-significant
AKAP1	-1.02501	-5.09089	7.78975e-07	6.71042e-05	5.54961	Down-regulated
EPN3	-1.16086	-5.09088	7.79004e-07	6.71042e-05	5.54957	Down-regulated
NDRG1	-0.845178	-5.09027	7.81248e-07	6.71042e-05	5.54687	Not-significant
PEX11B	-0.680829	-5.08961	7.83658e-07	6.71042e-05	5.54398	Not-significant
LYPD6B	-1.8352	-5.08461	8.02317e-07	6.83966e-05	5.52191	Down-regulated
TEX12	0.26592	5.07973	8.20922e-07	6.95311e-05	5.50041	Not-significant
GPER1	-2.20014	-5.07922	8.22875e-07	6.95311e-05	5.49818	Down-regulated
MED9	-0.490311	-5.07715	8.30899e-07	6.99012e-05	5.48908	Not-significant
PDILT	-1.03227	-5.07578	8.36272e-07	7.0046e-05	5.48303	Down-regulated
SCNN1B	-1.2079	-5.07007	8.58966e-07	7.1634e-05	5.45792	Down-regulated
DENND11	-0.812436	-5.05618	9.16752e-07	7.61222e-05	5.39687	Not-significant
APLP1	-1.23516	-5.05228	9.33649e-07	7.7191e-05	5.37974	Down-regulated
AK3	-0.770438	-5.0418	9.80491e-07	8.07159e-05	5.33385	Not-significant
TAPT1	-0.582205	-5.03499	1.01219e-06	8.2969e-05	5.30402	Not-significant
HOMER2	-1.81504	-5.03066	1.03287e-06	8.4304e-05	5.28506	Down-regulated
LRRC47	-0.603629	-5.02963	1.03782e-06	8.43493e-05	5.28058	Not-significant
PCDHGA8	0.24384	5.02869	1.04238e-06	8.43628e-05	5.27646	Not-significant
FABP5P3	-1.52928	-5.02652	1.05298e-06	8.48626e-05	5.26698	Down-regulated
KIF13B	-0.952437	-5.02064	1.08224e-06	8.68555e-05	5.24129	Down-regulated
CCT6B	-0.552526	-5.0146	1.11306e-06	8.8957e-05	5.21497	Not-significant
EIF2AK3	-0.829887	-5.00323	1.17353e-06	9.34001e-05	5.1654	Not-significant
ATP2A3	-1.17495	-4.99563	1.21568e-06	9.63549e-05	5.13233	Down-regulated
GNAT1	-0.350714	-4.99154	1.23894e-06	9.7795e-05	5.11457	Not-significant
VPS4A	-0.592511	-4.98426	1.28145e-06	0.000100335	5.08297	Not-significant
SEM1	1.24442	4.98424	1.28158e-06	0.000100335	5.08287	Up-regulated
YTHDC1	-0.526715	-4.98205	1.29467e-06	0.000100787	5.07335	Not-significant
TM9SF3	-0.988795	-4.98151	1.29786e-06	0.000100787	5.07104	Down-regulated
XKR8	-0.579399	-4.97606	1.33103e-06	0.000102945	5.04741	Not-significant
NEDD4L	-0.979988	-4.97246	1.35339e-06	0.000104255	5.0318	Down-regulated
OR8B4	0.237865	4.97017	1.3678e-06	0.000104943	5.02188	Not-significant
CNOT6L	-0.650418	-4.96235	1.4181e-06	0.000108369	4.98805	Not-significant
TSPOAP1	-0.606474	-4.96109	1.42643e-06	0.000108545	4.98257	Not-significant
PEAK3	-0.488893	-4.96028	1.43172e-06	0.000108545	4.9791	Not-significant
LOC100507351	0.319037	4.95822	1.44539e-06	0.00010915	4.9702	Not-significant
FUT8	-1.00711	-4.95728	1.45173e-06	0.000109198	4.9661	Down-regulated
SULT2A1	-1.67669	-4.954	1.47386e-06	0.00011043	4.95193	Down-regulated
HDAC6	-0.619275	-4.95121	1.49295e-06	0.000111425	4.93988	Not-significant
PIGN	-0.891181	-4.94967	1.50359e-06	0.000111784	4.93323	Not-significant
MST1L	-0.671889	-4.94801	1.5151e-06	0.000112205	4.92609	Not-significant
CA9	-2.51835	-4.93676	1.59568e-06	0.000117283	4.87756	Down-regulated
VAMP2	-0.961434	-4.93673	1.5959e-06	0.000117283	4.87743	Down-regulated
UBE4B	-0.577808	-4.93538	1.60583e-06	0.000117563	4.87163	Not-significant
ZNF75D	-0.633985	-4.93322	1.62184e-06	0.000118284	4.86234	Not-significant
TMEM219	-0.69928	-4.93022	1.64439e-06	0.000119145	4.84941	Not-significant
XPA	-0.445191	-4.92989	1.6469e-06	0.000119145	4.84798	Not-significant
EPB41L4A	-0.419982	-4.92918	1.65228e-06	0.000119145	4.84493	Not-significant
BLOC1S1	-0.717346	-4.9218	1.70926e-06	0.000122791	4.81319	Not-significant
TRMT10A	-0.505054	-4.91969	1.72586e-06	0.000123522	4.80414	Not-significant
PRKAA1	-0.580319	-4.9143	1.76903e-06	0.000126141	4.78101	Not-significant
ACAT1	-0.849449	-4.90217	1.87013e-06	0.000132366	4.729	Not-significant
KIAA0319L	-0.921792	-4.90217	1.87014e-06	0.000132366	4.72899	Down-regulated
RAPGEF4	-0.559025	-4.89415	1.93999e-06	0.000136805	4.69467	Not-significant
ALDH3A1	-2.68255	-4.89069	1.97091e-06	0.000138474	4.67988	Down-regulated
CAMK1G	-1.79048	-4.8899	1.97809e-06	0.000138474	4.67647	Down-regulated
LRIG1	-1.43504	-4.88747	2.00015e-06	0.000139508	4.6661	Down-regulated
EOLA1	-0.671306	-4.86837	2.18217e-06	0.000151474	4.5846	Not-significant
OTUD1	-0.806723	-4.86771	2.18874e-06	0.000151474	4.58179	Not-significant
PCMTD1	-0.772764	-4.86705	2.19539e-06	0.000151474	4.57895	Not-significant
CMTM4	-1.22925	-4.86205	2.24586e-06	0.000154283	4.55769	Down-regulated
TRIM74	-1.04843	-4.86143	2.25219e-06	0.000154283	4.55506	Down-regulated
AUH	-0.719731	-4.85827	2.28486e-06	0.000155964	4.54159	Not-significant
CYB5D2	-0.654984	-4.85509	2.31811e-06	0.000157673	4.52808	Not-significant
NDUFC1	-0.641815	-4.85172	2.35385e-06	0.000158995	4.51377	Not-significant
RAMAC	-0.850801	-4.8517	2.35413e-06	0.000158995	4.51365	Not-significant
POLDIP3	-0.586922	-4.84827	2.391e-06	0.000160918	4.49912	Not-significant
DDX17	-0.888412	-4.84742	2.40026e-06	0.000160977	4.4955	Not-significant
MAGEA2B	0.266477	4.84659	2.40935e-06	0.000161024	4.49197	Not-significant
ZSWIM6	-0.698029	-4.84219	2.45792e-06	0.000163699	4.4733	Not-significant
DUOX1	-1.10308	-4.84125	2.46843e-06	0.00016383	4.46932	Down-regulated
RBM47	-1.54005	-4.83892	2.49463e-06	0.000164998	4.45944	Down-regulated
RGMB	-1.46751	-4.83628	2.52466e-06	0.000165904	4.44825	Down-regulated
PPP1R15B	-0.755138	-4.83594	2.52861e-06	0.000165904	4.44679	Not-significant
SS18	-0.625942	-4.83533	2.53559e-06	0.000165904	4.44421	Not-significant
ARRDC4	-1.00151	-4.83416	2.54911e-06	0.000165904	4.43924	Down-regulated
CHGA	-2.88589	-4.83394	2.55157e-06	0.000165904	4.43834	Down-regulated
CNTFR	-0.846664	-4.83284	2.5644e-06	0.000166175	4.43365	Not-significant
SC5D	-0.985932	-4.827	2.63303e-06	0.000170047	4.40895	Down-regulated
OXCT1	-0.904819	-4.81614	2.7656e-06	0.000177822	4.36303	Down-regulated
SFTA3	0.253403	4.81534	2.77563e-06	0.000177822	4.35964	Not-significant
HPN	-1.34089	-4.81489	2.78122e-06	0.000177822	4.35776	Down-regulated
OR4K5	0.251515	4.81271	2.80875e-06	0.000178803	4.34856	Not-significant
UBE2J1	-0.941612	-4.8122	2.81521e-06	0.000178803	4.34641	Down-regulated
SOX21	-2.61032	-4.80089	2.96268e-06	0.000187548	4.29868	Down-regulated
ANKRD13B	0.375821	4.79847	2.99512e-06	0.000188978	4.2885	Not-significant
PIP4K2C	-0.867633	-4.7962	3.02588e-06	0.000190293	4.27895	Not-significant
CENPC	-0.472633	-4.7925	3.07677e-06	0.000192861	4.26337	Not-significant
GCM1	-0.443535	-4.79103	3.09721e-06	0.00019351	4.25718	Not-significant
SLC7A8	-1.3213	-4.7892	3.12281e-06	0.000194476	4.24949	Down-regulated
EBAG9	-0.707015	-4.78757	3.14573e-06	0.000194805	4.24265	Not-significant
PALM3	-0.754578	-4.78738	3.1484e-06	0.000194805	4.24186	Not-significant
EDEM3	-0.978659	-4.77764	3.28932e-06	0.00020287	4.20094	Down-regulated
TLK1	-0.573493	-4.77172	3.37804e-06	0.000207323	4.17608	Not-significant
ACAD10	-0.709436	-4.77138	3.38315e-06	0.000207323	4.17467	Not-significant
MAP2K4	-0.571049	-4.76842	3.42833e-06	0.000208916	4.16227	Not-significant
CAB39	-0.590175	-4.76799	3.43491e-06	0.000208916	4.16048	Not-significant
CYSTM1	-1.64353	-4.76694	3.45119e-06	0.000208916	4.15606	Down-regulated
PHF3	-0.627506	-4.76684	3.4527e-06	0.000208916	4.15565	Not-significant
RAB26	-1.16222	-4.76501	3.48124e-06	0.00020998	4.14796	Down-regulated
MIGA2	-0.696444	-4.7634	3.50634e-06	0.00021032	4.14125	Not-significant
DCTN4	-0.604471	-4.76325	3.50881e-06	0.00021032	4.1406	Not-significant
AMPD1	-1.01529	-4.76224	3.52465e-06	0.000210612	4.13639	Down-regulated
UGT1A4	0.273767	4.75511	3.639e-06	0.000216769	4.10657	Not-significant
TRIM33	-0.530223	-4.75083	3.70934e-06	0.000220275	4.08868	Not-significant
DENND6A	-0.637271	-4.75007	3.72208e-06	0.00022035	4.08548	Not-significant
DBT	-0.847864	-4.74692	3.77483e-06	0.000222785	4.07233	Not-significant
KLHL28	-0.64748	-4.74191	3.86022e-06	0.000227126	4.05144	Not-significant
INSIG2	-0.679051	-4.73543	3.97359e-06	0.000233081	4.02441	Not-significant
MAP3K21	-0.520652	-4.73066	4.05903e-06	0.000237367	4.00455	Not-significant
PRKAB1	-0.73605	-4.72492	4.16434e-06	0.00024231	3.98063	Not-significant
UTP3	-0.657508	-4.72437	4.1745e-06	0.00024231	3.97836	Not-significant
UQCRC2	-0.879225	-4.72399	4.18146e-06	0.00024231	3.9768	Not-significant
BICRAL	-0.595683	-4.72232	4.21269e-06	0.000243384	3.96986	Not-significant
ARHGAP21	-0.701531	-4.72036	4.24971e-06	0.000244786	3.96169	Not-significant
TNFRSF17	-1.58571	-4.71569	4.339e-06	0.000248686	3.94228	Down-regulated
PPP1R2C	0.240675	4.71546	4.34335e-06	0.000248686	3.94134	Not-significant
USP33	-0.680739	-4.71246	4.40181e-06	0.000251283	3.92886	Not-significant
LINC01546	0.251636	4.70793	4.4913e-06	0.000255631	3.91007	Not-significant
PRSS38	0.259182	4.7064	4.52197e-06	0.000256615	3.90372	Not-significant
GPRC5C	-1.58285	-4.70538	4.54245e-06	0.000257017	3.8995	Down-regulated
EPOR	-0.511592	-4.70265	4.59785e-06	0.00025901	3.88819	Not-significant
DCAF8L1	0.24131	4.70231	4.60469e-06	0.00025901	3.8868	Not-significant
OR2F2	0.222092	4.70111	4.62929e-06	0.000259633	3.88183	Not-significant
UBA5	-0.570554	-4.69964	4.65961e-06	0.000260571	3.87573	Not-significant
SLC4A2	-1.1186	-4.69892	4.67446e-06	0.000260642	3.87276	Down-regulated
TBC1D10A	-0.557038	-4.69709	4.71272e-06	0.000262014	3.86516	Not-significant
NMRK1	-0.706719	-4.69561	4.74368e-06	0.000262973	3.85904	Not-significant
NFYC	-0.471564	-4.69438	4.76972e-06	0.000263654	3.85394	Not-significant
LINC01003	0.23605	4.69171	4.82642e-06	0.000265535	3.84291	Not-significant
ACADM	-0.733082	-4.69148	4.83143e-06	0.000265535	3.84194	Not-significant
FUT1	-0.802066	-4.69025	4.85773e-06	0.000266217	3.83687	Not-significant
NBPF3	-0.700203	-4.68593	4.95161e-06	0.000270589	3.81901	Not-significant
RNASE1	-1.73874	-4.68454	4.98214e-06	0.000271484	3.81328	Down-regulated
GATA5	-1.39443	-4.6814	5.05199e-06	0.000274511	3.80028	Down-regulated
OSBPL9	-0.669012	-4.67652	5.16219e-06	0.000279706	3.78015	Not-significant
DCXR	-0.915754	-4.67493	5.1985e-06	0.00028088	3.77361	Down-regulated
MON2	-0.578414	-4.67346	5.23253e-06	0.000281924	3.76752	Not-significant
CIRBP	-0.868745	-4.67265	5.25117e-06	0.000282136	3.76421	Not-significant
CDK12	-1.60458	-4.67198	5.26683e-06	0.000282187	3.76143	Down-regulated
TMED6	-1.78238	-4.67075	5.29548e-06	0.000282932	3.75637	Down-regulated
CTDNEP1	-0.535081	-4.66741	5.37425e-06	0.000286343	3.74259	Not-significant
PER2	-0.79449	-4.66658	5.39393e-06	0.000286596	3.73918	Not-significant
CHKA	-0.979211	-4.66398	5.45618e-06	0.000288902	3.72848	Down-regulated
TBC1D9	-0.929146	-4.66351	5.46746e-06	0.000288902	3.72655	Down-regulated
MTX3	-0.635399	-4.66267	5.48786e-06	0.000289183	3.72308	Not-significant
ATP5PO	-0.709493	-4.6609	5.5307e-06	0.000290458	3.71582	Not-significant
SLC25A30	0.195192	4.66043	5.54234e-06	0.000290458	3.71386	Not-significant
TXNDC11	-0.751298	-4.65609	5.6493e-06	0.000295257	3.69603	Not-significant
ALKBH3	-0.594687	-4.64965	5.81185e-06	0.000302927	3.66958	Not-significant
FBXL13	-1.13598	-4.64677	5.88608e-06	0.000305063	3.65774	Down-regulated
GPT2	-1.47666	-4.64609	5.90364e-06	0.000305063	3.65496	Down-regulated
PBRM1	-0.472328	-4.64561	5.9161e-06	0.000305063	3.65299	Not-significant
CDC14B	-0.700809	-4.64556	5.91741e-06	0.000305063	3.65279	Not-significant
PHYH	-0.861177	-4.64499	5.93236e-06	0.000305063	3.65044	Not-significant
AHCTF1	-0.628347	-4.64323	5.97843e-06	0.000306492	3.64322	Not-significant
DHTKD1	-0.643102	-4.64245	5.99897e-06	0.000306492	3.64002	Not-significant
PBXIP1	-0.594723	-4.6421	6.00807e-06	0.000306492	3.63861	Not-significant
PDPK1	-0.540739	-4.639	6.09056e-06	0.000309522	3.62589	Not-significant
PLEKHH3	-0.788515	-4.63866	6.09975e-06	0.000309522	3.62449	Not-significant
RAB5B	-0.621521	-4.63771	6.12529e-06	0.000309998	3.62059	Not-significant
ARHGEF37	-1.01007	-4.6369	6.14719e-06	0.000310287	3.61726	Down-regulated
CPEB3	-0.65742	-4.63599	6.17177e-06	0.00031071	3.61354	Not-significant
SREK1	-0.633307	-4.63372	6.23341e-06	0.000312992	3.60428	Not-significant
TMEM270	0.319795	4.63147	6.2954e-06	0.000314882	3.59505	Not-significant
UCK1	0.400064	4.6304	6.32515e-06	0.000314882	3.59065	Not-significant
DIAPH3	-0.924862	-4.63009	6.3337e-06	0.000314882	3.58939	Down-regulated
OR4Q3	0.230902	4.62998	6.33672e-06	0.000314882	3.58895	Not-significant
FA2H	-1.36186	-4.6232	6.52793e-06	0.000323546	3.56123	Down-regulated
YIPF1	-0.633905	-4.62168	6.57166e-06	0.00032441	3.55501	Not-significant
PNN	-0.699291	-4.62142	6.5792e-06	0.00032441	3.55394	Not-significant
ELK3	0.278115	4.62026	6.61275e-06	0.000324615	3.5492	Not-significant
SENP7	-0.779519	-4.6201	6.61721e-06	0.000324615	3.54857	Not-significant
NECAP1	-0.582848	-4.6176	6.69032e-06	0.000327365	3.53833	Not-significant
LRBA	-0.635614	-4.61383	6.80143e-06	0.000331955	3.52297	Not-significant
C6orf120	-0.64093	-4.61174	6.86401e-06	0.000334159	3.51444	Not-significant
MEI1	-0.561282	-4.60836	6.96623e-06	0.000338276	3.50066	Not-significant
CDH12	0.221385	4.59944	7.24324e-06	0.000350534	3.46432	Not-significant
HSD17B4	-0.628271	-4.59906	7.2552e-06	0.000350534	3.46278	Not-significant
PLCL2	-0.863771	-4.59828	7.28005e-06	0.000350851	3.45959	Not-significant
NDUFA5	-0.612515	-4.59001	7.54748e-06	0.000362827	3.42598	Not-significant
TM7SF2	-1.16111	-4.58732	7.63641e-06	0.000366185	3.41506	Down-regulated
IGLL3P	-2.18777	-4.58156	7.83055e-06	0.000374285	3.39167	Down-regulated
RNA18SN5	-1.52928	-4.58116	7.84436e-06	0.000374285	3.39003	Down-regulated
ALDH1A1	-1.76088	-4.57819	7.94632e-06	0.000378209	3.378	Down-regulated
CYB5A	-0.936476	-4.57725	7.97894e-06	0.000378822	3.37418	Down-regulated
CLASP1	-0.524375	-4.57042	8.21935e-06	0.000388786	3.34653	Not-significant
ETFDH	-0.897868	-4.57014	8.22934e-06	0.000388786	3.3454	Not-significant
SELENOO	-0.566759	-4.56735	8.32973e-06	0.000391998	3.3341	Not-significant
ELOA3P	0.236128	4.56712	8.33821e-06	0.000391998	3.33315	Not-significant
PPP4R1L	0.240465	4.5613	8.55155e-06	0.000400139	3.30962	Not-significant
REP15	-1.68786	-4.56126	8.55309e-06	0.000400139	3.30946	Down-regulated
PRECSIT	0.288688	4.55994	8.60232e-06	0.000401462	3.30411	Not-significant
UPRT	-0.687302	-4.556	8.75053e-06	0.000407388	3.2882	Not-significant
TCERG1	-0.453306	-4.55386	8.83198e-06	0.000409245	3.27957	Not-significant
IRX2	-1.39463	-4.55383	8.83308e-06	0.000409245	3.27946	Down-regulated
UNC5CL	-1.18532	-4.54582	9.14504e-06	0.000422677	3.24714	Down-regulated
PHRF1	0.502981	4.53652	9.52048e-06	0.000438815	3.20968	Not-significant
SLAMF7	-0.675779	-4.53605	9.53994e-06	0.000438815	3.20778	Not-significant
NPY	-1.27009	-4.53371	9.63693e-06	0.000442215	3.19836	Down-regulated
KLF4	-1.39767	-4.53266	9.68076e-06	0.000442231	3.19414	Down-regulated
LIMK1	0.31427	4.5326	9.68339e-06	0.000442231	3.19388	Not-significant
ATP13A4	-0.43885	-4.53164	9.72334e-06	0.000443001	3.19005	Not-significant
DISP1	-0.930242	-4.53098	9.75133e-06	0.000443223	3.18737	Down-regulated
DKFZP586I1420	-0.530784	-4.52974	9.80368e-06	0.00044455	3.18239	Not-significant
DENND2B	-0.867618	-4.52886	9.84089e-06	0.000445184	3.17886	Not-significant
RBL2	-0.579383	-4.52199	1.0137e-05	0.000457501	3.15127	Not-significant
MTMR1	0.221198	4.52076	1.01909e-05	0.000458855	3.14633	Not-significant
S100A3	1.03118	4.51737	1.03406e-05	0.000464505	3.13276	Up-regulated
MAP3K14	-0.436257	-4.51564	1.04182e-05	0.000466112	3.1258	Not-significant
UBP1	-0.4587	-4.51501	1.04464e-05	0.000466112	3.12328	Not-significant
SNX14	-0.620252	-4.51495	1.04493e-05	0.000466112	3.12303	Not-significant
WTAP	-0.534564	-4.5093	1.07066e-05	0.000476482	3.10039	Not-significant
NICN1	-0.65005	-4.50312	1.09951e-05	0.000488187	3.07565	Not-significant
OR10J3	0.285482	4.50108	1.10919e-05	0.000491348	3.06749	Not-significant
CCDC78	0.24461	4.50035	1.11268e-05	0.000491758	3.06457	Not-significant
ZNF398	-0.367846	-4.49917	1.11831e-05	0.000493111	3.05987	Not-significant
CHAD	-0.370795	-4.49533	1.13693e-05	0.000500169	3.04451	Not-significant
RSPH6A	0.250823	4.49386	1.1441e-05	0.000502143	3.03866	Not-significant
CRY2	-0.733099	-4.49312	1.14776e-05	0.000502143	3.03569	Not-significant
MAN2A1	-0.751761	-4.49281	1.14927e-05	0.000502143	3.03447	Not-significant
UAP1	-0.729909	-4.49001	1.16315e-05	0.000507056	3.0233	Not-significant
DNAL4	-0.691447	-4.48598	1.18345e-05	0.000514733	3.0072	Not-significant
AATK	-0.569345	-4.4848	1.18942e-05	0.00051616	3.00252	Not-significant
CPTP	-0.515462	-4.48414	1.19283e-05	0.00051647	2.99986	Not-significant
TRIM2	-0.980686	-4.48299	1.19871e-05	0.000517847	2.99529	Down-regulated
AKAP17A	-0.567936	-4.48091	1.20942e-05	0.0005213	2.98701	Not-significant
LENG8	-0.49603	-4.47935	1.21754e-05	0.000523171	2.98079	Not-significant
TTC37	-0.621455	-4.47903	1.21921e-05	0.000523171	2.97951	Not-significant
GGT6	-1.46743	-4.47697	1.23e-05	0.000526569	2.97132	Down-regulated
PLPPR5	-0.543866	-4.47604	1.23489e-05	0.000526569	2.96762	Not-significant
NT5DC1	-0.609862	-4.47595	1.23537e-05	0.000526569	2.96727	Not-significant
ACOX3	-0.611881	-4.47493	1.24078e-05	0.000527703	2.9632	Not-significant
ENPP5	-0.965825	-4.47334	1.24928e-05	0.000530141	2.95686	Down-regulated
TAF6	-0.785156	-4.4723	1.25485e-05	0.000530169	2.95272	Not-significant
VPS37C	-0.550261	-4.47203	1.25628e-05	0.000530169	2.95165	Not-significant
LOC100128059	0.271256	4.47178	1.25763e-05	0.000530169	2.95065	Not-significant
SLC14A2	0.254361	4.46771	1.27972e-05	0.000538294	2.93447	Not-significant
TMEM238L	-1.53177	-4.46629	1.28746e-05	0.000540367	2.92886	Down-regulated
TAS2R40	0.230467	4.46452	1.29726e-05	0.000543289	2.92181	Not-significant
ADPRM	-0.503164	-4.46294	1.30602e-05	0.000545769	2.91555	Not-significant
SCN3A	-0.516079	-4.46158	1.31365e-05	0.000547765	2.91013	Not-significant
TSC22D3	-1.13833	-4.46055	1.31943e-05	0.00054898	2.90605	Down-regulated
RPL36A	-0.950319	-4.45871	1.32982e-05	0.000551286	2.89875	Down-regulated
ZNF85	-0.56783	-4.45855	1.33072e-05	0.000551286	2.89813	Not-significant
SLC1A2	-0.353893	-4.45724	1.33818e-05	0.000553182	2.89293	Not-significant
OR4C11	0.24146	4.45672	1.34119e-05	0.000553232	2.89084	Not-significant
ZSCAN16	-0.548214	-4.44983	1.38115e-05	0.00056841	2.86355	Not-significant
KCNC3	0.213073	4.44936	1.38391e-05	0.00056841	2.86169	Not-significant
CRACDL	-0.836169	-4.44625	1.40237e-05	0.000574761	2.84937	Not-significant
DHX32	-0.707434	-4.44078	1.43539e-05	0.000587042	2.82774	Not-significant
SCAMP1	-0.618715	-4.43786	1.45336e-05	0.000593126	2.81617	Not-significant
PGA5	-4.50512	-4.43441	1.47481e-05	0.0006006	2.80256	Down-regulated
NIPSNAP2	-0.720678	-4.43337	1.48137e-05	0.000601997	2.79843	Not-significant
STYX	-0.581856	-4.42785	1.51647e-05	0.000614957	2.77667	Not-significant
FEM1C	-0.61644	-4.42403	1.54127e-05	0.000623696	2.76159	Not-significant
MTMR4	-0.579001	-4.42329	1.54609e-05	0.000624328	2.75869	Not-significant
NWD1	-0.554523	-4.42042	1.56504e-05	0.000630652	2.74737	Not-significant
ADTRP	-1.50565	-4.41951	1.57113e-05	0.000631781	2.74376	Down-regulated
GCNT1	-1.52908	-4.41574	1.59639e-05	0.00064037	2.72895	Down-regulated
OR2D3	-0.296786	-4.41533	1.59917e-05	0.00064037	2.72733	Not-significant
GGNBP2	-0.545822	-4.40703	1.65639e-05	0.000661899	2.69467	Not-significant
DGAT2L6	0.236153	4.40634	1.66119e-05	0.000662439	2.69198	Not-significant
SUCLG1	-0.722528	-4.4044	1.67489e-05	0.000665496	2.68435	Not-significant
EIF3A	-0.643376	-4.40403	1.67752e-05	0.000665496	2.68289	Not-significant
ARHGAP24	-0.764738	-4.4034	1.682e-05	0.000665496	2.68041	Not-significant
ZNF679	-0.443737	-4.40329	1.68274e-05	0.000665496	2.68001	Not-significant
RPS6KC1	-0.599869	-4.39874	1.71543e-05	0.000675668	2.66213	Not-significant
JCHAIN	-2.49298	-4.39873	1.7155e-05	0.000675668	2.6621	Down-regulated
ACSS1	-0.916891	-4.39767	1.72323e-05	0.000677322	2.65792	Down-regulated
BAG5	-0.450431	-4.397	1.72807e-05	0.000677834	2.65532	Not-significant
IQGAP2	-1.12105	-4.39566	1.73787e-05	0.000680287	2.65006	Down-regulated
USH1G	-0.343198	-4.39349	1.75386e-05	0.000682326	2.64156	Not-significant
SURF1	-0.584204	-4.39346	1.7541e-05	0.000682326	2.64143	Not-significant
ENHO	-0.487414	-4.39328	1.75546e-05	0.000682326	2.64071	Not-significant
BCLAF1	-0.490993	-4.39303	1.75731e-05	0.000682326	2.63973	Not-significant
RNASE4	-1.28158	-4.39066	1.77494e-05	0.000687782	2.63046	Down-regulated
SEPHS1P1	0.343284	4.38641	1.80709e-05	0.000698825	2.61379	Not-significant
ESRRB	-0.348955	-4.38417	1.82419e-05	0.00070319	2.60505	Not-significant
ZNF684	-0.430111	-4.38387	1.82648e-05	0.00070319	2.60388	Not-significant
DYNLT5	0.299303	4.3835	1.82937e-05	0.00070319	2.60241	Not-significant
RPL13P5	-0.768961	-4.38261	1.83619e-05	0.000703453	2.59896	Not-significant
TMPRSS2	-1.96712	-4.38246	1.83739e-05	0.000703453	2.59835	Down-regulated
ZNF444	-0.68998	-4.38118	1.8473e-05	0.000705839	2.59335	Not-significant
KCNJ13	-1.17553	-4.3797	1.85883e-05	0.000708734	2.58758	Down-regulated
CRAT	-0.728376	-4.37926	1.86227e-05	0.000708734	2.58586	Not-significant
HEATR5B	-0.563513	-4.3758	1.88961e-05	0.000717714	2.57233	Not-significant
TTC3	-0.575685	-4.37353	1.90776e-05	0.000723179	2.56345	Not-significant
KCNJ15	-0.58801	-4.37189	1.92095e-05	0.000726739	2.55706	Not-significant
PDIK1L	-0.612129	-4.37088	1.9291e-05	0.000728388	2.55313	Not-significant
AKR1B15	-2.64206	-4.3699	1.93713e-05	0.000729983	2.54927	Down-regulated
RPRM	-1.40011	-4.36791	1.95332e-05	0.000734641	2.54154	Down-regulated
IGBP1	-0.629911	-4.36173	2.0047e-05	0.000750779	2.51744	Not-significant
C15orf32	0.273534	4.36153	2.00639e-05	0.000750779	2.51666	Not-significant
LDHB	-1.13145	-4.36131	2.00823e-05	0.000750779	2.51581	Down-regulated
ARMC12	-0.663333	-4.36088	2.01189e-05	0.000750779	2.51412	Not-significant
TMEM181	-0.732219	-4.35967	2.02214e-05	0.000753138	2.50941	Not-significant
TEX2	-0.713769	-4.3584	2.03291e-05	0.000755682	2.50447	Not-significant
AP1G1	-0.618114	-4.35608	2.05284e-05	0.000761614	2.49542	Not-significant
SRRM2	-0.689869	-4.3529	2.08036e-05	0.000768223	2.48306	Not-significant
CPT2	-0.858838	-4.35245	2.08432e-05	0.000768223	2.48129	Not-significant
CXCL17	-2.05318	-4.35219	2.08659e-05	0.000768223	2.48029	Down-regulated
OVCH2	-0.403379	-4.35218	2.08667e-05	0.000768223	2.48025	Not-significant
H3-3B	-0.768185	-4.34872	2.11709e-05	0.00077793	2.46682	Not-significant
ADA	-1.2316	-4.34675	2.13465e-05	0.000782882	2.45915	Down-regulated
CWH43	-0.711046	-4.34541	2.14667e-05	0.000785787	2.45394	Not-significant
MICU2	-0.583356	-4.34435	2.15622e-05	0.000786549	2.44983	Not-significant
LDHD	-1.16221	-4.3439	2.16025e-05	0.000786549	2.44809	Down-regulated
P2RY1	0.231235	4.34381	2.16105e-05	0.000786549	2.44775	Not-significant
C1orf216	0.651077	4.34287	2.1696e-05	0.000786574	2.44408	Not-significant
DEPTOR	-0.983645	-4.34251	2.17284e-05	0.000786574	2.4427	Down-regulated
ZNF140	-0.591402	-4.34245	2.17342e-05	0.000786574	2.44245	Not-significant
FAM168A	0.211655	4.34174	2.17989e-05	0.000787355	2.43969	Not-significant
PPM1A	-0.643754	-4.34102	2.18643e-05	0.000787355	2.43692	Not-significant
DRAXIN	0.281116	4.34086	2.1879e-05	0.000787355	2.43629	Not-significant
RNF10	-0.526102	-4.33895	2.20542e-05	0.000792177	2.42889	Not-significant
FH	-0.574629	-4.33798	2.21445e-05	0.000792641	2.4251	Not-significant
NUPR2	-1.1876	-4.33792	2.21498e-05	0.000792641	2.42488	Down-regulated
SEC24A	-0.808137	-4.33675	2.22584e-05	0.000795045	2.42034	Not-significant
ATF7IP2	-0.819455	-4.33578	2.23486e-05	0.000796782	2.41659	Not-significant
ZNF721	-0.613251	-4.33522	2.2401e-05	0.000797169	2.41441	Not-significant
TSC1	-0.594236	-4.33453	2.24661e-05	0.000798004	2.41172	Not-significant
SDHA	-0.700505	-4.33106	2.27939e-05	0.000808152	2.39828	Not-significant
HECA	-0.720843	-4.32666	2.32158e-05	0.000821593	2.38127	Not-significant
COX7B	-0.764811	-4.32509	2.33683e-05	0.000825464	2.3752	Not-significant
TMEM161B	-0.332809	-4.32349	2.35254e-05	0.000827646	2.36898	Not-significant
UBE2D3	-0.460696	-4.32318	2.35559e-05	0.000827646	2.36778	Not-significant
MDH1	-0.672273	-4.32314	2.35595e-05	0.000827646	2.36764	Not-significant
ZNF449	0.20036	4.32104	2.37665e-05	0.000832348	2.35953	Not-significant
SSBP3	-0.808947	-4.3209	2.37801e-05	0.000832348	2.35899	Not-significant
NDUFV2	-0.571183	-4.3189	2.39789e-05	0.000837031	2.35127	Not-significant
CNBP	-0.67503	-4.31868	2.40012e-05	0.000837031	2.35041	Not-significant
CCDC28A	-0.623316	-4.31785	2.40845e-05	0.000838411	2.3472	Not-significant
SERPINI1	-0.615661	-4.3166	2.42106e-05	0.000841276	2.34235	Not-significant
IDI1	-0.799681	-4.31426	2.4447e-05	0.000846552	2.33334	Not-significant
BCKDHB	-0.74534	-4.31423	2.44507e-05	0.000846552	2.3332	Not-significant
PDHA1	-0.688717	-4.3115	2.47301e-05	0.000854682	2.32266	Not-significant
PF4	0.229013	4.30816	2.50753e-05	0.000862564	2.30981	Not-significant
CSAD	-0.645553	-4.30773	2.51205e-05	0.000862564	2.30814	Not-significant
SGSM3	-0.784368	-4.30761	2.51326e-05	0.000862564	2.30769	Not-significant
ELL2	-0.804498	-4.30725	2.51709e-05	0.000862564	2.30628	Not-significant
GPBP1	-0.541983	-4.30713	2.5183e-05	0.000862564	2.30583	Not-significant
COQ8A	-0.842267	-4.30218	2.57064e-05	0.00087892	2.28676	Not-significant
SPAG7	-0.557072	-4.30123	2.58079e-05	0.000880821	2.28311	Not-significant
NUCB2	-0.935265	-4.29706	2.6259e-05	0.000894625	2.26704	Down-regulated
SLC25A38	-0.557556	-4.29483	2.65033e-05	0.000901346	2.25846	Not-significant
CAPN11	0.465604	4.29112	2.69145e-05	0.00091296	2.24418	Not-significant
RAET1L	0.258564	4.29089	2.69399e-05	0.00091296	2.24331	Not-significant
ERCC6	0.245749	4.29034	2.70011e-05	0.000913417	2.24121	Not-significant
ATG14	-0.563229	-4.28975	2.7067e-05	0.000914036	2.23895	Not-significant
MCEE	-0.606816	-4.28913	2.71372e-05	0.000914795	2.23655	Not-significant
GALK2	-0.532993	-4.28788	2.72783e-05	0.000917938	2.23174	Not-significant
SPATA20	-0.783131	-4.28653	2.74306e-05	0.000921085	2.22658	Not-significant
NR3C2	-0.931217	-4.28621	2.74678e-05	0.000921085	2.22532	Down-regulated
BATF3	0.643655	4.28562	2.75342e-05	0.000921505	2.22309	Not-significant
YPEL5	-0.70222	-4.28486	2.76216e-05	0.000921505	2.22015	Not-significant
THUMPD1	-0.576513	-4.28483	2.76245e-05	0.000921505	2.22005	Not-significant
ATP6V0A4	0.201927	4.28383	2.77389e-05	0.000923714	2.21622	Not-significant
PTPN4	-0.566865	-4.27962	2.8227e-05	0.00093834	2.20005	Not-significant
SORBS2	-1.41299	-4.27749	2.84764e-05	0.000944584	2.1919	Down-regulated
TMEM256	-0.627157	-4.2769	2.85459e-05	0.000944584	2.18964	Not-significant
RIMS4	-0.343511	-4.27659	2.85829e-05	0.000944584	2.18844	Not-significant
LINC02875	0.361619	4.27635	2.86118e-05	0.000944584	2.1875	Not-significant
LYST	-0.505211	-4.27073	2.92836e-05	0.000965102	2.166	Not-significant
PCBP2	-0.417455	-4.26754	2.96722e-05	0.000976229	2.15378	Not-significant
PXMP2	-1.0304	-4.26645	2.98064e-05	0.000978968	2.1496	Down-regulated
H2BU1	0.213994	4.26549	2.99249e-05	0.000981179	2.14592	Not-significant
ATRN	-0.712241	-4.26502	2.99827e-05	0.000981395	2.14414	Not-significant
PPFIBP2	-0.989563	-4.26379	3.01346e-05	0.000984689	2.13945	Down-regulated
SYTL3	-0.631597	-4.26221	3.03325e-05	0.000988742	2.13339	Not-significant
HECTD1	-0.623958	-4.26197	3.03618e-05	0.000988742	2.1325	Not-significant
SH3BGRL2	-1.11802	-4.26034	3.05663e-05	0.00099281	2.12628	Down-regulated
WARS2	-0.633994	-4.26015	3.05902e-05	0.00099281	2.12555	Not-significant
TRAPPC10	-0.336123	-4.25941	3.06841e-05	0.000993394	2.12271	Not-significant
SYCE2	0.222625	4.25919	3.07118e-05	0.000993394	2.12188	Not-significant
TIMM10B	-0.452747	-4.25708	3.09807e-05	0.00100041	2.1138	Not-significant
ECHDC3	-1.44657	-4.25656	3.10472e-05	0.00100087	2.11182	Down-regulated
KCTD8	-0.41841	-4.25551	3.11809e-05	0.00100349	2.10784	Not-significant
MPPE1	-0.53564	-4.25265	3.15515e-05	0.00101372	2.09689	Not-significant
HARS2	-0.515624	-4.25	3.18965e-05	0.00101778	2.08682	Not-significant
RABGEF1P1	0.302941	4.24976	3.1928e-05	0.00101778	2.0859	Not-significant
DCUN1D4	-0.677488	-4.24967	3.19408e-05	0.00101778	2.08553	Not-significant
HIBADH	-0.657026	-4.24965	3.19429e-05	0.00101778	2.08547	Not-significant
TRMT10C	-0.67527	-4.2496	3.19491e-05	0.00101778	2.08529	Not-significant
CD300C	0.328549	4.24922	3.19994e-05	0.00101778	2.08383	Not-significant
DAZAP1	0.830101	4.24884	3.20495e-05	0.00101778	2.08238	Not-significant
MRPL10	-0.530114	-4.24745	3.22338e-05	0.00102073	2.07707	Not-significant
TMCO4	-0.366607	-4.24734	3.22486e-05	0.00102073	2.07665	Not-significant
ERO1B	-0.724364	-4.24683	3.23161e-05	0.00102118	2.07471	Not-significant
HIP1R	-1.08045	-4.2444	3.26411e-05	0.00102975	2.06544	Down-regulated
PDE3A	0.26543	4.2431	3.28149e-05	0.00103353	2.06052	Not-significant
CDA	1.01744	4.24171	3.3003e-05	0.00103704	2.05523	Up-regulated
MRPS18B	-0.639271	-4.24148	3.30344e-05	0.00103704	2.05435	Not-significant
RAB37	-0.900331	-4.23716	3.36258e-05	0.00105388	2.03792	Down-regulated
NHLRC3	-0.539569	-4.23647	3.37211e-05	0.00105396	2.0353	Not-significant
REC8	-1.25124	-4.23635	3.37382e-05	0.00105396	2.03483	Down-regulated
C2CD5	-0.565729	-4.23482	3.39513e-05	0.00105889	2.029	Not-significant
SPPL2B	-0.582097	-4.23267	3.42515e-05	0.00106652	2.02085	Not-significant
FAM162A	-0.852057	-4.23217	3.43224e-05	0.001067	2.01893	Not-significant
BAGE2	0.219272	4.2303	3.4586e-05	0.00107228	2.01185	Not-significant
MT1IP	-1.36569	-4.2298	3.46565e-05	0.00107228	2.00996	Down-regulated
GC	-1.55027	-4.22978	3.466e-05	0.00107228	2.00987	Down-regulated
GLYR1	-0.503075	-4.2293	3.47283e-05	0.00107246	2.00805	Not-significant
SPATA25	0.201508	4.22883	3.47953e-05	0.00107246	2.00626	Not-significant
VSIG1	-2.3071	-4.22856	3.48335e-05	0.00107246	2.00525	Down-regulated
CYP4X1	-1.33685	-4.22807	3.49038e-05	0.0010729	2.00338	Down-regulated
DDX53	0.200883	4.22495	3.53527e-05	0.00108358	1.99155	Not-significant
FGFBP3	-0.226904	-4.22487	3.53641e-05	0.00108358	1.99125	Not-significant
FAM171A2	0.219837	4.22402	3.54877e-05	0.00108477	1.98802	Not-significant
SERINC1	-0.69519	-4.22383	3.55162e-05	0.00108477	1.98728	Not-significant
MMUT	-0.581556	-4.22091	3.59429e-05	0.00109606	1.97622	Not-significant
SLC25A4	-1.3224	-4.21876	3.62605e-05	0.00110399	1.96808	Down-regulated
TMEM104	0.358457	4.21761	3.64315e-05	0.00110689	1.96372	Not-significant
PTPRN2	-0.832083	-4.21735	3.64713e-05	0.00110689	1.96271	Not-significant
EIF5A2	-0.757549	-4.21644	3.66069e-05	0.00110925	1.95927	Not-significant
TMEM86B	-0.879083	-4.21378	3.70077e-05	0.00111963	1.9492	Not-significant
SLC41A1	-0.621328	-4.21297	3.71295e-05	0.00112154	1.94615	Not-significant
CNGB3	0.257495	4.20883	3.77631e-05	0.00113889	1.93049	Not-significant
HIPK1	0.221394	4.20758	3.79571e-05	0.00114294	1.92575	Not-significant
LARGE1	-0.652742	-4.20483	3.83856e-05	0.00115228	1.91536	Not-significant
ISG15	1.37929	4.20482	3.83873e-05	0.00115228	1.91532	Up-regulated
LIMD1	0.254186	4.20305	3.86651e-05	0.00115765	1.90865	Not-significant
TGFB2	0.284309	4.20291	3.8687e-05	0.00115765	1.90812	Not-significant
AKR7A3	-1.68365	-4.20202	3.8828e-05	0.00116001	1.90476	Down-regulated
LRMDA	-0.835901	-4.20165	3.88869e-05	0.00116001	1.90336	Not-significant
TAS2R19	0.210327	4.20076	3.9028e-05	0.00116242	1.9	Not-significant
CARD17	0.213882	4.19736	3.95727e-05	0.00117653	1.88718	Not-significant
NGLY1	-0.62078	-4.19704	3.96245e-05	0.00117653	1.88597	Not-significant
KCND3	-0.267869	-4.19659	3.96977e-05	0.00117688	1.88426	Not-significant
MSMP	0.219077	4.19568	3.98449e-05	0.00117796	1.88084	Not-significant
HNRNPH3	-0.533414	-4.19561	3.98568e-05	0.00117796	1.88056	Not-significant
GAREM1	-0.743771	-4.19435	4.00616e-05	0.00118219	1.87582	Not-significant
IDI2	0.240664	4.19306	4.02736e-05	0.00118662	1.87093	Not-significant
SLC26A7	-0.31829	-4.19237	4.03857e-05	0.00118809	1.86836	Not-significant
IGFALS	-0.99795	-4.19183	4.04746e-05	0.00118889	1.86633	Down-regulated
IST1	-0.408496	-4.19105	4.06041e-05	0.00119087	1.86337	Not-significant
RPS6KA5	-0.744521	-4.19053	4.06896e-05	0.00119118	1.86143	Not-significant
ARMCX5	-0.583008	-4.19007	4.07664e-05	0.00119118	1.85968	Not-significant
ZC2HC1B	0.204118	4.18986	4.08009e-05	0.00119118	1.8589	Not-significant
MGC16025	0.213985	4.18891	4.09593e-05	0.00119355	1.85531	Not-significant
TAB2	-0.662086	-4.18863	4.10065e-05	0.00119355	1.85425	Not-significant
UBE2DNL	0.213037	4.18809	4.10965e-05	0.00119435	1.85222	Not-significant
KCNAB2	0.232778	4.18765	4.11707e-05	0.0011947	1.85055	Not-significant
ADAMTS13	-0.282136	-4.18462	4.16809e-05	0.00120768	1.83916	Not-significant
HNRNPDL	-0.6577	-4.18266	4.20144e-05	0.00121217	1.83179	Not-significant
THAP3	0.270228	4.18234	4.20695e-05	0.00121217	1.83058	Not-significant
CD99P1	0.212144	4.18232	4.20722e-05	0.00121217	1.83052	Not-significant
EFCAB9	0.20253	4.18223	4.20888e-05	0.00121217	1.83015	Not-significant
CDC6	0.366296	4.18107	4.22869e-05	0.00121605	1.82581	Not-significant
RDH12	-0.901989	-4.17881	4.26764e-05	0.00122541	1.81733	Down-regulated
TPD52L1	-1.05532	-4.17586	4.31915e-05	0.00123835	1.80623	Down-regulated
RAP1GAP	-1.7531	-4.17549	4.32559e-05	0.00123835	1.80485	Down-regulated
CCDC93	0.332577	4.17504	4.33365e-05	0.0012388	1.80313	Not-significant
SYNE2	-0.824463	-4.17409	4.35033e-05	0.00124172	1.79958	Not-significant
OR4P4	0.202363	4.17263	4.37617e-05	0.00124724	1.7941	Not-significant
SHCBP1L	0.238839	4.17037	4.41652e-05	0.00125563	1.78561	Not-significant
HERPUD1	-0.985326	-4.17025	4.4187e-05	0.00125563	1.78516	Down-regulated
HOXD12	-0.449919	-4.16807	4.45784e-05	0.00126376	1.777	Not-significant
GLIS2	0.224592	4.16793	4.46048e-05	0.00126376	1.77645	Not-significant
PHF1	-0.596725	-4.16628	4.49033e-05	0.00127034	1.77029	Not-significant
SEMA7A	0.316318	4.1649	4.51549e-05	0.00127557	1.76512	Not-significant
NAA60	-0.588444	-4.16062	4.59462e-05	0.00129602	1.74906	Not-significant
SLC7A5P1	0.230837	4.15977	4.61038e-05	0.00129856	1.74589	Not-significant
FAM3B	-2.20429	-4.15924	4.6203e-05	0.00129944	1.7439	Down-regulated
HSD17B8	-0.595986	-4.15839	4.63617e-05	0.00130086	1.74073	Not-significant
YWHAE	-0.829421	-4.15825	4.6389e-05	0.00130086	1.74019	Not-significant
RP1	0.233306	4.15767	4.64967e-05	0.00130198	1.73804	Not-significant
TTC12	-0.507389	-4.15392	4.72076e-05	0.00131996	1.72402	Not-significant
PTEN	-0.592614	-4.15276	4.74314e-05	0.00132428	1.71964	Not-significant
SLC22A23	-1.14204	-4.15061	4.7844e-05	0.00133386	1.71164	Down-regulated
CCDC25	-0.606276	-4.14878	4.81991e-05	0.00134181	1.7048	Not-significant
ACTR1B	-0.564509	-4.14665	4.86165e-05	0.00135064	1.69683	Not-significant
DLG3	-0.53486	-4.14644	4.86572e-05	0.00135064	1.69606	Not-significant
NUMB	-0.448564	-4.14334	4.92704e-05	0.00136463	1.68448	Not-significant
TMEM131	-0.670399	-4.14318	4.93035e-05	0.00136463	1.68386	Not-significant
DDT	-0.68638	-4.14091	4.97561e-05	0.00137518	1.67542	Not-significant
HAS3	-1.37229	-4.13865	5.02113e-05	0.00138576	1.667	Down-regulated
RTRAF	-0.544243	-4.13782	5.03809e-05	0.00138844	1.66388	Not-significant
ZNF189	-0.482097	-4.13603	5.07462e-05	0.0013965	1.65721	Not-significant
CEMIP	2.00119	4.13562	5.08298e-05	0.0013968	1.65569	Up-regulated
DCDC1	0.19817	4.13518	5.09189e-05	0.00139725	1.65407	Not-significant
NUS1	-0.596847	-4.13426	5.11084e-05	0.00140044	1.65064	Not-significant
UBE3B	-0.487884	-4.13325	5.13183e-05	0.00140419	1.64685	Not-significant
C6orf62	-0.554539	-4.13262	5.14488e-05	0.00140575	1.6445	Not-significant
HABP2	-1.58717	-4.13162	5.16565e-05	0.00140942	1.64078	Down-regulated
SCFD1	-0.521144	-4.13097	5.17903e-05	0.00141106	1.63839	Not-significant
CD163L1	-0.833406	-4.13056	5.1876e-05	0.00141139	1.63686	Not-significant
TRIM51GP	0.231008	4.12997	5.19992e-05	0.00141274	1.63467	Not-significant
MLNR	0.228352	4.1295	5.20991e-05	0.00141345	1.6329	Not-significant
GBGT1	-0.777319	-4.12848	5.23122e-05	0.0014163	1.62912	Not-significant
MUC6	-1.42327	-4.12823	5.23647e-05	0.0014163	1.6282	Down-regulated
OR8K5	0.284499	4.12787	5.24426e-05	0.0014163	1.62682	Not-significant
HOOK2	-0.710348	-4.1276	5.24992e-05	0.0014163	1.62583	Not-significant
PTGS1	-1.06459	-4.12607	5.28224e-05	0.00142301	1.62016	Down-regulated
ADAM22	0.228219	4.12524	5.29997e-05	0.00142579	1.61706	Not-significant
HIPK2	-0.922979	-4.12411	5.32402e-05	0.00142859	1.61288	Down-regulated
SLC22A9	0.199251	4.12372	5.33242e-05	0.00142859	1.61142	Not-significant
AGL	-0.636334	-4.12352	5.33677e-05	0.00142859	1.61067	Not-significant
SNTA1	-0.556434	-4.12336	5.34019e-05	0.00142859	1.61008	Not-significant
NBPF11	-0.63778	-4.12208	5.36775e-05	0.00143306	1.60532	Not-significant
USP27X	0.232017	4.12169	5.37614e-05	0.00143306	1.60388	Not-significant
PPP3CA	-0.655846	-4.12126	5.38554e-05	0.00143306	1.60226	Not-significant
DICER1	-0.68115	-4.12098	5.39167e-05	0.00143306	1.60121	Not-significant
AVPR1A	0.234284	4.12055	5.40086e-05	0.00143306	1.59964	Not-significant
NAA16	-0.463442	-4.12051	5.40172e-05	0.00143306	1.59949	Not-significant
LOXL2	0.206257	4.11991	5.4148e-05	0.00143455	1.59726	Not-significant
YPEL3	-0.672328	-4.11829	5.45017e-05	0.00144193	1.59124	Not-significant
CHRNA1	0.337112	4.11763	5.46458e-05	0.00144375	1.5888	Not-significant
CALR	-0.754846	-4.11718	5.47461e-05	0.00144441	1.58711	Not-significant
CLK4	-0.528274	-4.11519	5.51839e-05	0.00145396	1.57975	Not-significant
MIOX	0.225683	4.11453	5.53315e-05	0.00145585	1.57728	Not-significant
FAM3A	-0.572221	-4.113	5.56735e-05	0.00146284	1.57159	Not-significant
C2orf73	0.192472	4.1121	5.58735e-05	0.00146609	1.56828	Not-significant
TDRD3	-0.398661	-4.11071	5.61854e-05	0.00147226	1.56314	Not-significant
UGT2B15	-0.987436	-4.11009	5.63269e-05	0.00147395	1.56082	Down-regulated
OSBPL2	-0.571956	-4.10967	5.64219e-05	0.00147443	1.55926	Not-significant
AKR7L	-1.10045	-4.1091	5.65502e-05	0.00147577	1.55716	Down-regulated
RHOBTB1	-0.744884	-4.10872	5.66379e-05	0.00147605	1.55573	Not-significant
KRTAP10-12	0.21268	4.10672	5.70941e-05	0.00148592	1.54832	Not-significant
QSOX1	-0.875088	-4.10597	5.72645e-05	0.00148833	1.54557	Not-significant
DHPS	-0.513012	-4.10501	5.74857e-05	0.00149206	1.54201	Not-significant
AMZ1	0.189509	4.10328	5.78857e-05	0.00149718	1.5356	Not-significant
OSBP	-0.468217	-4.10305	5.79396e-05	0.00149718	1.53475	Not-significant
ECHDC2	-0.837781	-4.10299	5.79528e-05	0.00149718	1.53453	Not-significant
ENOSF1	-0.84989	-4.10281	5.79952e-05	0.00149718	1.53386	Not-significant
SPRY3	0.218941	4.10107	5.83996e-05	0.0015056	1.52744	Not-significant
ID4	-0.844773	-4.10059	5.85139e-05	0.00150652	1.52564	Not-significant
IGFBP2	-1.48683	-4.09942	5.8787e-05	0.00151152	1.52134	Down-regulated
NANP	-0.485224	-4.09629	5.95301e-05	0.00152858	1.50974	Not-significant
PIFO	-0.375915	-4.0955	5.97182e-05	0.00153136	1.50683	Not-significant
COL9A2	-1.17273	-4.0927	6.03916e-05	0.00154656	1.49647	Down-regulated
LCE1A	0.259514	4.0897	6.11198e-05	0.0015612	1.48541	Not-significant
C4orf33	-0.794409	-4.08967	6.11263e-05	0.0015612	1.48531	Not-significant
TMPRSS13	0.266774	4.08808	6.15173e-05	0.00156799	1.47942	Not-significant
IL1F10	0.221791	4.08792	6.15555e-05	0.00156799	1.47885	Not-significant
STX10	-0.635221	-4.08577	6.20858e-05	0.0015794	1.47093	Not-significant
FAM133DP	0.215611	4.08311	6.27488e-05	0.00159415	1.46113	Not-significant
STEAP3	-1.05312	-4.08084	6.3322e-05	0.00160659	1.45273	Down-regulated
HADHB	-0.634762	-4.07962	6.36305e-05	0.00161228	1.44825	Not-significant
NPEPPS	-0.535055	-4.07766	6.41304e-05	0.0016228	1.44102	Not-significant
FBXW4	-0.519217	-4.07506	6.47977e-05	0.00163753	1.43147	Not-significant
FOXJ3	-0.43488	-4.07318	6.52839e-05	0.00164764	1.42457	Not-significant
ZNF644	-0.490423	-4.07202	6.5587e-05	0.00165303	1.4203	Not-significant
KIAA1522	-1.0155	-4.07171	6.56695e-05	0.00165303	1.41914	Down-regulated
PSORS1C1	-0.675607	-4.07023	6.60577e-05	0.00165955	1.4137	Not-significant
SIRT5	-0.525414	-4.07006	6.61016e-05	0.00165955	1.41308	Not-significant
FRMD1	-0.555158	-4.06958	6.62283e-05	0.00166056	1.41132	Not-significant
PKDCC	1.15233	4.06811	6.66169e-05	0.00166812	1.40592	Up-regulated
OR2A20P	-0.31694	-4.06733	6.68242e-05	0.00167113	1.40305	Not-significant
TBX15	0.274346	4.06569	6.72621e-05	0.00167989	1.39702	Not-significant
CELF4	-0.440257	-4.06498	6.74533e-05	0.00168247	1.3944	Not-significant
COG3	-0.614575	-4.06427	6.76424e-05	0.00168329	1.39182	Not-significant
PEBP1	-0.688887	-4.0642	6.76616e-05	0.00168329	1.39156	Not-significant
TXNL1	-0.836256	-4.06299	6.79876e-05	0.00168875	1.38713	Not-significant
TSPYL1	-0.558309	-4.06274	6.80572e-05	0.00168875	1.38618	Not-significant
FAN1	-0.456281	-4.0621	6.82286e-05	0.00169082	1.38386	Not-significant
ATXN8OS	0.214127	4.06094	6.85459e-05	0.00169649	1.37958	Not-significant
LRRIQ4	0.348046	4.06036	6.87031e-05	0.00169819	1.37747	Not-significant
MRPL1	-0.547104	-4.05916	6.90325e-05	0.00170064	1.37305	Not-significant
WBP2	-0.652996	-4.05915	6.90332e-05	0.00170064	1.37304	Not-significant
TMEM198B	-0.606945	-4.05875	6.91439e-05	0.00170064	1.37157	Not-significant
UGT2B17	-1.56625	-4.0587	6.9157e-05	0.00170064	1.37139	Down-regulated
EPHB3	-0.755872	-4.05674	6.96976e-05	0.00171174	1.36421	Not-significant
ELP2	-0.45036	-4.05483	7.02286e-05	0.00172258	1.35721	Not-significant
CDV3	-0.645322	-4.05341	7.06255e-05	0.0017301	1.35201	Not-significant
RAB18	-0.515937	-4.05114	7.1267e-05	0.00174255	1.34367	Not-significant
PRPS1L1	0.260777	4.05096	7.13153e-05	0.00174255	1.34304	Not-significant
USP24	-0.513436	-4.04855	7.20016e-05	0.00175708	1.33421	Not-significant
RAB6D	0.264542	4.04667	7.25415e-05	0.001768	1.32732	Not-significant
GOLGA8B	-0.963516	-4.04556	7.28597e-05	0.0017735	1.32328	Down-regulated
ARHGEF28	-0.329808	-4.04482	7.30754e-05	0.0017765	1.32055	Not-significant
ATM	-0.747939	-4.0438	7.3372e-05	0.00178145	1.31682	Not-significant
PCCA	-0.900064	-4.04243	7.37701e-05	0.00178828	1.31183	Down-regulated
ADRB2	-0.862819	-4.04212	7.38607e-05	0.00178828	1.3107	Not-significant
NMD3	-0.691519	-4.04161	7.40104e-05	0.00178828	1.30883	Not-significant
SGK1	-1.06388	-4.04156	7.40261e-05	0.00178828	1.30863	Down-regulated
DHRS4	-0.590389	-4.04016	7.4438e-05	0.00179597	1.30352	Not-significant
CST9	-0.365882	-4.03951	7.463e-05	0.00179834	1.30114	Not-significant
GOT2	-0.645409	-4.03857	7.49064e-05	0.00180274	1.29773	Not-significant
ZBTB8OS	-0.652869	-4.03779	7.51384e-05	0.00180605	1.29488	Not-significant
LINC00917	0.205592	4.03721	7.53119e-05	0.0018074	1.29275	Not-significant
MOV10L1	0.209606	4.03671	7.54618e-05	0.0018074	1.29092	Not-significant
ARFIP1	-0.573408	-4.03665	7.5477e-05	0.0018074	1.29073	Not-significant
KANSL1	-0.479153	-4.03586	7.57156e-05	0.00181085	1.28782	Not-significant
COQ9	-0.72041	-4.02822	7.80364e-05	0.00186205	1.25999	Not-significant
HSP90AA6P	0.21975	4.02805	7.80891e-05	0.00186205	1.25936	Not-significant
MAST4	-0.600799	-4.02786	7.81475e-05	0.00186205	1.25867	Not-significant
RNF208	-0.405699	-4.02567	7.88262e-05	0.00187589	1.2507	Not-significant
ABCD3	-0.567205	-4.02411	7.93149e-05	0.00188518	1.24501	Not-significant
GNG7	-0.778295	-4.02261	7.97856e-05	0.00189402	1.23955	Not-significant
CMC4	-0.514724	-4.02156	8.01152e-05	0.00189584	1.23575	Not-significant
AGGF1	-0.517914	-4.02147	8.01457e-05	0.00189584	1.2354	Not-significant
SLC12A2	-1.45154	-4.02143	8.0159e-05	0.00189584	1.23525	Down-regulated
AKR1A1	-0.635328	-4.02002	8.06053e-05	0.00190248	1.23013	Not-significant
ME2	-0.601483	-4.01962	8.07318e-05	0.00190248	1.22868	Not-significant
TENT5C	-1.35889	-4.0196	8.07372e-05	0.00190248	1.22862	Down-regulated
SEC63	-0.3345	-4.01913	8.08879e-05	0.00190369	1.2269	Not-significant
PSG6	0.278356	4.01782	8.13086e-05	0.00191125	1.22212	Not-significant
CRBN	-0.563463	-4.01562	8.20168e-05	0.00192554	1.21413	Not-significant
ZNF648	0.209472	4.01512	8.21765e-05	0.0019262	1.21234	Not-significant
GSTA1	-2.27115	-4.01491	8.22457e-05	0.0019262	1.21156	Down-regulated
RAB1A	-0.490104	-4.01413	8.25004e-05	0.0019298	1.20871	Not-significant
GOLGA8CP	-1.11152	-4.01374	8.26246e-05	0.00193036	1.20732	Down-regulated
C1QTNF2	0.192494	4.01271	8.29623e-05	0.00193589	1.20356	Not-significant
NTHL1	0.8002	4.01197	8.32058e-05	0.00193818	1.20086	Not-significant
MMP15	-0.792793	-4.01179	8.32625e-05	0.00193818	1.20024	Not-significant
MINDY3	-0.469969	-4.0108	8.35877e-05	0.00194339	1.19664	Not-significant
SLC19A2	-0.299801	-4.0102	8.3787e-05	0.00194566	1.19445	Not-significant
ATP5PD	-0.509877	-4.00653	8.50062e-05	0.00197159	1.18114	Not-significant
ANGPTL6	-0.511176	-4.00542	8.53789e-05	0.00197784	1.1771	Not-significant
PEX7	-0.726267	-4.00369	8.59601e-05	0.0019889	1.17085	Not-significant
GRM1	0.204894	4.00134	8.67602e-05	0.002005	1.16232	Not-significant
GOPC	-0.391101	-3.99936	8.74378e-05	0.00201822	1.15515	Not-significant
ADGRF4	0.265177	3.99883	8.76176e-05	0.00201994	1.15326	Not-significant
RNU2-1	-0.675927	-3.99842	8.77603e-05	0.00202081	1.15176	Not-significant
BTD	-0.618494	-3.99765	8.80268e-05	0.00202265	1.14896	Not-significant
DHCR24	-1.11159	-3.99758	8.80513e-05	0.00202265	1.14871	Down-regulated
DCLRE1B	0.299958	3.99656	8.84027e-05	0.00202829	1.14504	Not-significant
ORM2	-1.61778	-3.99474	8.90381e-05	0.00204043	1.13844	Down-regulated
RORC	-0.854033	-3.99399	8.93016e-05	0.00204403	1.13572	Not-significant
F13B	0.218271	3.98978	9.07876e-05	0.00207368	1.12052	Not-significant
DGKI	0.223498	3.98971	9.08132e-05	0.00207368	1.12026	Not-significant
SCOC	-0.691424	-3.98893	9.10914e-05	0.00207755	1.11744	Not-significant
FABP3	-0.715373	-3.98802	9.14157e-05	0.00208248	1.11416	Not-significant
NOSTRIN	-0.920931	-3.98755	9.15874e-05	0.00208391	1.11244	Down-regulated
XKR9	0.208041	3.98291	9.32673e-05	0.00211899	1.0957	Not-significant
EYA2	-1.3809	-3.98268	9.33502e-05	0.00211899	1.09488	Down-regulated
C18orf25	-0.477397	-3.98191	9.36319e-05	0.0021228	1.0921	Not-significant
ECPAS	-0.530009	-3.98126	9.38695e-05	0.0021228	1.08977	Not-significant
RBMY1E	0.20587	3.98099	9.39693e-05	0.0021228	1.08879	Not-significant
STARD7	-0.518243	-3.98094	9.39902e-05	0.0021228	1.08858	Not-significant
SAMM50	-0.555149	-3.98072	9.40711e-05	0.0021228	1.08779	Not-significant
GOLGA4	-0.487383	-3.98032	9.42157e-05	0.00212356	1.08638	Not-significant
SEC11C	-0.873909	-3.97952	9.45132e-05	0.00212777	1.08348	Not-significant
TSPY26P	0.199197	3.97903	9.46948e-05	0.00212936	1.08171	Not-significant
TOX4	-0.436946	-3.97851	9.48862e-05	0.00213116	1.07985	Not-significant
LGR5	0.221949	3.97784	9.51366e-05	0.00213429	1.07742	Not-significant
RBM5	-0.543583	-3.97593	9.58513e-05	0.00214589	1.07053	Not-significant
ANKRD12	-0.53167	-3.97586	9.58777e-05	0.00214589	1.07028	Not-significant
SPATS2	-0.463923	-3.97459	9.63533e-05	0.00215403	1.06572	Not-significant
UBE2I	0.886002	3.97293	9.69802e-05	0.00216331	1.05975	Not-significant
XPC	-0.495885	-3.9729	9.69941e-05	0.00216331	1.05962	Not-significant
CAT	-0.835804	-3.97061	9.78634e-05	0.00218016	1.0514	Not-significant
FUNDC1	-0.800818	-3.96924	9.83906e-05	0.00218936	1.04645	Not-significant
CHRM3	-1.03721	-3.9686	9.86361e-05	0.00219228	1.04416	Down-regulated
PLEKHH1	-0.829235	-3.96724	9.91608e-05	0.00220125	1.03928	Not-significant
OR4E2	0.191535	3.96685	9.93126e-05	0.00220125	1.03787	Not-significant
ALDH5A1	-0.982449	-3.96667	9.93837e-05	0.00220125	1.03721	Down-regulated
ALDH2	-0.931521	-3.96617	9.95769e-05	0.00220298	1.03542	Down-regulated
MED13L	-0.359342	-3.96566	9.97765e-05	0.00220485	1.03358	Not-significant
DSC1	0.229644	3.96437	0.000100278	0.00221339	1.02896	Not-significant
SH3YL1	-0.977158	-3.96278	0.000100903	0.00222462	1.02324	Down-regulated
TRPC5OS	0.19434	3.96213	0.000101161	0.00222774	1.02089	Not-significant
SPOCK3	0.215337	3.9614	0.00010145	0.00223154	1.01827	Not-significant
HID1	-0.950758	-3.96103	0.000101597	0.00223223	1.01693	Down-regulated
ZNF33A	-0.415814	-3.95998	0.000102011	0.00223763	1.01319	Not-significant
STAT5B	-0.518438	-3.95982	0.000102077	0.00223763	1.0126	Not-significant
CCDC90B	-0.54444	-3.959	0.000102401	0.00224077	1.00967	Not-significant
ARPC1B	0.83951	3.95887	0.000102453	0.00224077	1.00921	Not-significant
MBOAT1	-0.799545	-3.95818	0.000102731	0.00224428	1.00672	Not-significant
ABL2	0.306678	3.95748	0.000103012	0.00224786	1.0042	Not-significant
PCDHGA5	0.205559	3.95561	0.000103765	0.00226173	0.997494	Not-significant
SELENBP1	-1.14185	-3.95353	0.000104609	0.00227754	0.99004	Down-regulated
PAPSS1	-0.700063	-3.95302	0.000104819	0.00227952	0.988193	Not-significant
VPS33B	-0.444705	-3.95202	0.000105226	0.00228578	0.984626	Not-significant
FBXL3	-0.603821	-3.95134	0.000105506	0.00228843	0.982186	Not-significant
PLXDC1	0.280481	3.95067	0.00010578	0.00228843	0.979797	Not-significant
ZFAND6	-0.573375	-3.9505	0.000105852	0.00228843	0.979168	Not-significant
SNORD15B	-0.708353	-3.95034	0.000105919	0.00228843	0.978589	Not-significant
CWC22	-0.499141	-3.95014	0.000106001	0.00228843	0.977878	Not-significant
PPP1R3B	0.285351	3.94998	0.000106064	0.00228843	0.977328	Not-significant
ATMIN	-0.705647	-3.94884	0.000106536	0.00229603	0.973244	Not-significant
NKAPD1	-0.370659	-3.94836	0.000106735	0.00229736	0.971527	Not-significant
MIER3	0.225623	3.94812	0.000106837	0.00229736	0.970645	Not-significant
TBC1D4	-0.702497	-3.94643	0.000107541	0.00230991	0.964602	Not-significant
IGSF3	-0.961445	-3.94599	0.000107725	0.00231123	0.963032	Down-regulated
AMY1A	0.276305	3.94571	0.000107844	0.00231123	0.962018	Not-significant
GLIS1	0.19159	3.94525	0.000108037	0.0023128	0.960365	Not-significant
CYTH1	-0.606352	-3.9427	0.000109111	0.00233088	0.951268	Not-significant
MBNL3	-0.80415	-3.94267	0.000109125	0.00233088	0.951149	Not-significant
FBXL15	-0.442698	-3.94166	0.000109554	0.00233745	0.947536	Not-significant
KCNK2	-0.549172	-3.94115	0.00010977	0.00233945	0.945724	Not-significant
NUP54	-0.466669	-3.93987	0.000110321	0.00234857	0.941122	Not-significant
OR13C3	0.206908	3.93814	0.000111064	0.00236177	0.934944	Not-significant
IFNA16	0.24457	3.93767	0.000111265	0.00236342	0.933284	Not-significant
ATN1	-0.786828	-3.93688	0.000111608	0.00236809	0.930451	Not-significant
ADH1C	-2.51928	-3.93618	0.00011191	0.00237187	0.927965	Down-regulated
PLAAT5	0.215295	3.93557	0.000112176	0.00237489	0.925779	Not-significant
SULT1C2	-1.97768	-3.93447	0.000112655	0.0023824	0.92186	Down-regulated
PCOTH	0.229707	3.93377	0.000112962	0.00238488	0.919356	Not-significant
IKZF3	-0.316892	-3.93364	0.000113021	0.00238488	0.918875	Not-significant
CLDN1	1.72737	3.93303	0.000113286	0.00238785	0.91672	Up-regulated
LINC02908	0.202747	3.93195	0.000113762	0.00239525	0.912865	Not-significant
SRSF11	-0.814902	-3.93134	0.000114033	0.00239832	0.910677	Not-significant
PCDHA12	0.199048	3.92872	0.000115197	0.00242014	0.901339	Not-significant
MUL1	-0.529107	-3.92751	0.000115737	0.00242802	0.897032	Not-significant
C11orf54	-0.668389	-3.92732	0.000115825	0.00242802	0.896335	Not-significant
ST7-OT4	0.20355	3.92583	0.000116495	0.00243724	0.891029	Not-significant
PLEKHF2	-0.718939	-3.92578	0.000116519	0.00243724	0.890842	Not-significant
PLCXD1	-1.03751	-3.92519	0.000116783	0.00244011	0.888757	Down-regulated
ASB8	-0.433758	-3.92406	0.000117295	0.00244814	0.884732	Not-significant
PTGER2	-0.873466	-3.92338	0.000117606	0.00245195	0.882302	Not-significant
CDCP2	0.208953	3.92141	0.000118507	0.00246806	0.875283	Not-significant
CHAC1	-0.465498	-3.91958	0.000119347	0.00248286	0.868784	Not-significant
ZNF81	0.207649	3.91873	0.000119741	0.00248836	0.865754	Not-significant
BAZ2B	-0.526509	-3.91486	0.000121549	0.00252319	0.851978	Not-significant
TIMM17A	0.336142	3.91373	0.000122078	0.00252886	0.847982	Not-significant
XG	0.222776	3.91372	0.000122086	0.00252886	0.847923	Not-significant
LNX2	-0.643556	-3.91238	0.000122721	0.00253698	0.843155	Not-significant
SLC16A6	0.304285	3.91233	0.000122742	0.00253698	0.842992	Not-significant
TOMM70	-0.49577	-3.91171	0.000123038	0.00253915	0.840783	Not-significant
TYR	0.248315	3.91155	0.000123112	0.00253915	0.840227	Not-significant
RGS20	0.19767	3.91054	0.000123592	0.00254632	0.836648	Not-significant
H2AB1	0.220472	3.90903	0.000124318	0.00255853	0.831262	Not-significant
KRT17	1.85542	3.90845	0.000124596	0.00256151	0.829208	Up-regulated
TP53INP1	-0.918027	-3.90774	0.000124936	0.00256573	0.826707	Down-regulated
PYROXD2	-0.590438	-3.90622	0.000125674	0.00257813	0.821291	Not-significant
STIM1	-0.584696	-3.90448	0.000126521	0.00259274	0.815117	Not-significant
RNF122	-0.442572	-3.90201	0.000127732	0.00261475	0.806364	Not-significant
RPS4Y2	-1.34886	-3.90068	0.00012839	0.00262382	0.801639	Down-regulated
FAM110C	0.262298	3.90056	0.000128448	0.00262382	0.80122	Not-significant
GPR15	0.234935	3.90013	0.000128659	0.00262532	0.799718	Not-significant
PDE8A	-0.392496	-3.89943	0.000129009	0.00262966	0.797221	Not-significant
COL23A1	-0.548616	-3.89863	0.000129406	0.00263496	0.794396	Not-significant
RNF181	-0.505792	-3.8977	0.000129873	0.00264166	0.791085	Not-significant
ZNF700	-0.629772	-3.89596	0.000130746	0.00265661	0.784926	Not-significant
PCF11	-0.444123	-3.89546	0.000130999	0.00265694	0.783149	Not-significant
TSC22D2	-0.611329	-3.89538	0.000131039	0.00265694	0.782867	Not-significant
MRTFB	-0.693129	-3.89343	0.000132023	0.00267322	0.775994	Not-significant
PLEKHJ1	-0.657414	-3.89324	0.000132121	0.00267322	0.775312	Not-significant
GPR141	0.202973	3.89146	0.000133029	0.00268876	0.769015	Not-significant
NRG4	-0.863851	-3.89113	0.0001332	0.00268938	0.767835	Not-significant
THAP12	-0.532718	-3.88778	0.000134928	0.0027214	0.755994	Not-significant
B3GAT2	0.188737	3.88723	0.000135213	0.00272303	0.754055	Not-significant
FBXW11	-0.494182	-3.88707	0.000135293	0.00272303	0.753512	Not-significant
TCHHL1	0.219743	3.88585	0.000135932	0.00273304	0.749178	Not-significant
PLCE1	-0.642384	-3.88533	0.000136201	0.00273557	0.747366	Not-significant
HELQ	-0.392029	-3.88498	0.000136386	0.00273642	0.746119	Not-significant
SCYL3	-0.445271	-3.88305	0.000137404	0.00275148	0.739283	Not-significant
CDC14A	-0.427114	-3.88295	0.000137457	0.00275148	0.738933	Not-significant
XIRP2	0.193697	3.88274	0.000137567	0.00275148	0.738196	Not-significant
SMIM26	-0.533125	-3.88235	0.000137775	0.00275277	0.73681	Not-significant
PACS1	-0.709553	-3.88154	0.000138202	0.00275699	0.733968	Not-significant
ACTRT1	-0.671842	-3.8814	0.000138274	0.00275699	0.733488	Not-significant
ACAD8	-0.488377	-3.87876	0.000139687	0.00278228	0.724147	Not-significant
ACADVL	-0.635068	-3.87761	0.0001403	0.00278773	0.720121	Not-significant
MAN2A2	-0.378982	-3.87752	0.000140353	0.00278773	0.719775	Not-significant
PSMC3IP	0.347035	3.87744	0.000140396	0.00278773	0.719493	Not-significant
FUCA1	-0.831651	-3.87595	0.000141198	0.00280075	0.714262	Not-significant
VSIG2	-2.44325	-3.87555	0.000141417	0.00280218	0.712842	Down-regulated
CEP57	-0.57595	-3.87523	0.000141592	0.00280276	0.711704	Not-significant
RAD18	0.209838	3.87326	0.000142664	0.00282035	0.704777	Not-significant
KLK11	-2.03526	-3.87306	0.000142775	0.00282035	0.704063	Down-regulated
IL17B	0.302154	3.87175	0.000143495	0.00282733	0.699443	Not-significant
IVNS1ABP	-0.689701	-3.87153	0.000143612	0.00282733	0.698691	Not-significant
FZD7	-0.688971	-3.87141	0.000143682	0.00282733	0.698246	Not-significant
TEX30	-0.45027	-3.87114	0.000143826	0.00282733	0.697322	Not-significant
TTC16	-0.303559	-3.87107	0.000143865	0.00282733	0.697076	Not-significant
PNISR	-0.518861	-3.87059	0.000144133	0.00282971	0.695363	Not-significant
MAP3K5	-0.802667	-3.86934	0.000144826	0.00283886	0.690962	Not-significant
LIN7C	-0.720225	-3.86921	0.000144896	0.00283886	0.690518	Not-significant
RHOT1	-0.517495	-3.86838	0.000145356	0.00284498	0.687603	Not-significant
AKR1C2	-2.12986	-3.8669	0.000146184	0.00285826	0.682389	Down-regulated
SHTN1	-0.792707	-3.86592	0.000146735	0.00286112	0.678931	Not-significant
ACSM3	-1.09978	-3.86583	0.000146784	0.00286112	0.67863	Down-regulated
SOCS7	0.300187	3.86577	0.00014682	0.00286112	0.678405	Not-significant
RGS7	-0.360231	-3.86526	0.000147106	0.00286112	0.676617	Not-significant
FOXD2-AS1	0.317694	3.86512	0.000147181	0.00286112	0.676145	Not-significant
TOX3	-0.896573	-3.86505	0.000147225	0.00286112	0.675871	Not-significant
PPARGC1A	-0.912555	-3.86384	0.000147907	0.00286819	0.671626	Down-regulated
RNA28SN5	-1.60895	-3.86348	0.000148111	0.00286819	0.67036	Down-regulated
CDH2	-1.23999	-3.86344	0.000148131	0.00286819	0.670237	Down-regulated
OGT	-0.681661	-3.86334	0.000148187	0.00286819	0.66989	Not-significant
WAC	-0.437799	-3.86291	0.000148434	0.00287007	0.668364	Not-significant
PTK2B	-0.54112	-3.86065	0.000149725	0.00289212	0.66041	Not-significant
HK1	-0.722573	-3.85943	0.000150421	0.00290264	0.656152	Not-significant
FAM241A	-0.626575	-3.85763	0.000151462	0.0029198	0.649818	Not-significant
TDP2	-0.920566	-3.85689	0.000151891	0.00292513	0.64722	Down-regulated
GHR	-1.04229	-3.85533	0.000152798	0.00293963	0.641758	Down-regulated
CCDC63	0.195596	3.85497	0.000153011	0.00294079	0.640476	Not-significant
RNF20	-0.384691	-3.8545	0.000153287	0.00294313	0.638826	Not-significant
ATP5PB	-0.558752	-3.8531	0.000154105	0.00295368	0.633939	Not-significant
SCAMP5	-0.71046	-3.85304	0.000154144	0.00295368	0.633707	Not-significant
ADRB1	0.217847	3.85256	0.000154423	0.00295567	0.632044	Not-significant
TMEM63C	-0.272021	-3.85234	0.000154556	0.00295567	0.631254	Not-significant
FITM2	0.2993	3.85038	0.000155716	0.00297254	0.624391	Not-significant
OR5W2	0.174223	3.85033	0.000155748	0.00297254	0.624202	Not-significant
SLC22A13	0.210161	3.84913	0.000156458	0.00298259	0.620026	Not-significant
ANKRD13A	-0.5408	-3.84892	0.000156586	0.00298259	0.619277	Not-significant
TTTY14	-0.582327	-3.84755	0.000157403	0.00299519	0.614496	Not-significant
GOT1L1	0.205463	3.84429	0.000159375	0.0030297	0.603071	Not-significant
BPIFC	0.224134	3.84389	0.000159622	0.00303014	0.601652	Not-significant
CLINT1	-0.740489	-3.84373	0.000159714	0.00303014	0.601121	Not-significant
TAS2R50	0.187762	3.84288	0.000160232	0.00303697	0.598146	Not-significant
PRDM1	-0.907309	-3.84167	0.000160975	0.00304046	0.593905	Down-regulated
GPR101	0.199222	3.8416	0.00016102	0.00304046	0.593647	Not-significant
ENTPD5	-0.960737	-3.84159	0.000161023	0.00304046	0.593631	Down-regulated
TAF1C	-0.60753	-3.84155	0.00016105	0.00304046	0.593473	Not-significant
KDM5D	-0.991396	-3.84016	0.000161905	0.00305359	0.588615	Down-regulated
LAMTOR3	-0.551948	-3.83982	0.000162115	0.00305455	0.587425	Not-significant
TUBGCP3	0.201959	3.8388	0.000162743	0.00306331	0.583878	Not-significant
REEP5	-0.598929	-3.83855	0.0001629	0.00306331	0.582995	Not-significant
CD164	-0.957696	-3.83787	0.000163322	0.00306825	0.580618	Down-regulated
GPR107	0.220577	3.8368	0.000163991	0.00307542	0.576867	Not-significant
ATP5MC1	-0.608868	-3.83674	0.000164025	0.00307542	0.57668	Not-significant
SLC45A3	-1.12617	-3.83528	0.000164942	0.0030896	0.571561	Down-regulated
CAPN9	-2.11998	-3.83463	0.000165347	0.00309206	0.56931	Down-regulated
PPP2R3C	-0.453738	-3.83456	0.000165396	0.00309206	0.56904	Not-significant
ZIM2	0.208248	3.83341	0.000166116	0.0031025	0.565054	Not-significant
TOR1AIP1	-0.753843	-3.8323	0.000166823	0.00311268	0.561156	Not-significant
PCDHGB4	0.419785	3.82931	0.000168726	0.00314512	0.550749	Not-significant
LIAS	-0.532423	-3.82882	0.00016904	0.00314792	0.549042	Not-significant
PER3	-0.762838	-3.82759	0.000169838	0.00315971	0.544723	Not-significant
PNPLA2	-0.865557	-3.82705	0.000170186	0.00316311	0.542846	Not-significant
PPIL4	0.208016	3.82629	0.000170675	0.00316914	0.540211	Not-significant
SLCO5A1	0.280208	3.82548	0.000171201	0.00317583	0.53739	Not-significant
ADIPOR2	-0.660219	-3.8247	0.000171707	0.00318214	0.534681	Not-significant
TMEM80	-0.54111	-3.82432	0.000171956	0.00318367	0.533353	Not-significant
EPB41L4B	-0.975997	-3.82365	0.000172398	0.00318877	0.531	Down-regulated
RPLP2	-0.197331	-3.82257	0.000173107	0.00319814	0.527231	Not-significant
CENPP	0.370769	3.82237	0.000173237	0.00319814	0.526542	Not-significant
PLA2G2E	0.237011	3.82059	0.000174413	0.00321398	0.520336	Not-significant
ARID3C	0.197424	3.82056	0.000174431	0.00321398	0.520245	Not-significant
SCGB1C1	0.216821	3.81997	0.000174824	0.00321787	0.518177	Not-significant
MEAK7	0.276161	3.81973	0.000174977	0.00321787	0.517374	Not-significant
SMIM21	0.166836	3.81906	0.000175425	0.00322302	0.51503	Not-significant
PHEX	0.205512	3.81685	0.000176901	0.00324702	0.507347	Not-significant
BTBD8	0.219021	3.81573	0.000177658	0.00325779	0.503431	Not-significant
KRTAP23-1	0.218095	3.81503	0.00017813	0.0032625	0.500996	Not-significant
POTEA	0.188521	3.81484	0.000178254	0.0032625	0.500356	Not-significant
ST13	-0.505384	-3.81413	0.000178735	0.00326447	0.497886	Not-significant
HMGN3	-0.474611	-3.81388	0.000178906	0.00326447	0.497008	Not-significant
WBP11	-0.513771	-3.81357	0.000179117	0.00326447	0.495931	Not-significant
IRX5	-0.641574	-3.81347	0.00017918	0.00326447	0.495604	Not-significant
XKR3	0.184226	3.81343	0.000179213	0.00326447	0.495437	Not-significant
PPP3R2	0.185625	3.81266	0.000179732	0.00327082	0.492785	Not-significant
DDX4	0.23487	3.81199	0.000180192	0.00327607	0.490443	Not-significant
GSTA2	-1.8815	-3.81065	0.000181106	0.00328958	0.485799	Down-regulated
ZNF780B	0.189389	3.80994	0.000181596	0.00329536	0.483324	Not-significant
ECHDC1	-0.604007	-3.80939	0.000181976	0.00329914	0.481406	Not-significant
TAB1	-0.407412	-3.80866	0.000182475	0.00330506	0.478895	Not-significant
NALF2	-0.198523	-3.80825	0.000182764	0.00330717	0.477444	Not-significant
LARP4	-0.641727	-3.80559	0.000184612	0.00333745	0.468221	Not-significant
TMEM151A	-0.791478	-3.80485	0.00018513	0.00334221	0.465649	Not-significant
TMEM259	-0.615644	-3.80466	0.000185257	0.00334221	0.465019	Not-significant
CACFD1	-0.710391	-3.80446	0.000185398	0.00334221	0.464326	Not-significant
CRLF2	0.187218	3.80372	0.000185921	0.0033464	0.461741	Not-significant
ACADL	-0.344773	-3.80364	0.000185979	0.0033464	0.461456	Not-significant
OR13C5	0.216254	3.80186	0.000187232	0.00335655	0.455299	Not-significant
LSM3	-0.552045	-3.80173	0.000187322	0.00335655	0.454859	Not-significant
RNF175	0.311482	3.80166	0.000187376	0.00335655	0.454592	Not-significant
EFCAB14	-0.511406	-3.8013	0.000187629	0.00335655	0.453359	Not-significant
STK32B	-0.783821	-3.80117	0.000187722	0.00335655	0.452902	Not-significant
TRIM24	-0.703358	-3.80113	0.000187752	0.00335655	0.452756	Not-significant
GNMT	-0.478058	-3.80094	0.000187887	0.00335655	0.452096	Not-significant
RNASE2	0.413252	3.80086	0.000187943	0.00335655	0.451825	Not-significant
PCDHA13	0.200036	3.79957	0.000188857	0.00336973	0.447377	Not-significant
ME1	-1.01639	-3.79902	0.000189251	0.00337186	0.445464	Down-regulated
FAP	1.10748	3.79892	0.000189328	0.00337186	0.445094	Up-regulated
GKN2	-3.68747	-3.79793	0.000190033	0.00337902	0.441684	Down-regulated
RPUSD4	-0.541202	-3.79786	0.000190082	0.00337902	0.441449	Not-significant
NDUFA13	-0.480619	-3.79742	0.000190397	0.00338149	0.439931	Not-significant
BMP5	-0.451958	-3.7971	0.000190633	0.00338255	0.438795	Not-significant
OR10H1	0.202274	3.7958	0.000191565	0.00339537	0.434323	Not-significant
OR10A6	0.173682	3.7956	0.00019171	0.00339537	0.433632	Not-significant
TRIM68	-0.389299	-3.79428	0.000192671	0.00340771	0.429048	Not-significant
GRIN2D	0.227727	3.79416	0.000192762	0.00340771	0.428617	Not-significant
IDH2	-0.791724	-3.79145	0.000194741	0.00343953	0.419254	Not-significant
GOLGA7B	0.348173	3.79004	0.000195779	0.00345185	0.414382	Not-significant
ODAM	-1.06242	-3.78986	0.000195911	0.00345185	0.413761	Down-regulated
LENEP	0.201519	3.7897	0.000196033	0.00345185	0.413193	Not-significant
OMA1	-0.473738	-3.78929	0.000196331	0.00345185	0.411802	Not-significant
OLIG2	0.244446	3.78928	0.000196338	0.00345185	0.411766	Not-significant
SIK1	0.906917	3.78867	0.000196789	0.0034566	0.409666	Up-regulated
HTATSF1	0.180752	3.78696	0.000198062	0.00347241	0.403757	Not-significant
KRTAP10-11	-0.296233	-3.78695	0.000198069	0.00347241	0.403722	Not-significant
CCNDBP1	-0.603215	-3.78674	0.000198232	0.00347241	0.402969	Not-significant
OR6S1	0.188927	3.78639	0.000198494	0.00347382	0.401761	Not-significant
DUSP26	-0.452639	-3.78274	0.000201237	0.00351862	0.389183	Not-significant
CA4	-1.05077	-3.78235	0.000201533	0.00352058	0.387836	Down-regulated
IDNK	-0.654251	-3.78168	0.00020204	0.00352624	0.385531	Not-significant
EIF4B	-0.601917	-3.77973	0.000203535	0.00354648	0.378775	Not-significant
UBE2E3	-0.627977	-3.77948	0.000203726	0.00354648	0.37792	Not-significant
LINC00311	0.216172	3.77944	0.000203755	0.00354648	0.377788	Not-significant
RPS6KB1	-0.483334	-3.77865	0.000204358	0.00355375	0.37508	Not-significant
MKRN1	-0.377488	-3.77788	0.000204951	0.00356084	0.372425	Not-significant
ZBTB12	0.206285	3.77678	0.000205804	0.00356971	0.368619	Not-significant
ZNF384	-0.36877	-3.77667	0.000205888	0.00356971	0.368248	Not-significant
PIM3	-0.748588	-3.7765	0.00020602	0.00356971	0.367658	Not-significant
NR4A3	0.238349	3.77621	0.000206248	0.00357043	0.366647	Not-significant
SLC44A2	-0.676197	-3.77291	0.000208823	0.00360802	0.355278	Not-significant
OR1K1	0.194797	3.77286	0.000208861	0.00360802	0.355113	Not-significant
CAMK2N1	1.5158	3.77266	0.000209014	0.00360802	0.354438	Up-regulated
COL2A1	-0.596271	-3.77246	0.000209171	0.00360802	0.353751	Not-significant
ACSM2A	0.195871	3.77206	0.000209489	0.00361025	0.35236	Not-significant
RCOR3	-0.566683	-3.77159	0.00020986	0.00361311	0.35074	Not-significant
FAM30A	-0.540026	-3.77137	0.000210032	0.00361311	0.349991	Not-significant
TTC19	-0.496932	-3.77105	0.000210288	0.00361428	0.348872	Not-significant
CLVS2	0.266106	3.7707	0.000210559	0.00361569	0.347696	Not-significant
SLC39A11	-1.03055	-3.76904	0.000211875	0.00363254	0.341985	Down-regulated
HOXA11-AS	0.237389	3.76899	0.000211918	0.00363254	0.341799	Not-significant
UMODL1-AS1	-0.309825	-3.76873	0.000212128	0.00363288	0.340893	Not-significant
BNIP3	-1.06881	-3.76829	0.000212471	0.00363552	0.339411	Down-regulated
HINT2	-0.501837	-3.76756	0.00021306	0.00364234	0.336878	Not-significant
DEFB108B	0.197906	3.76699	0.000213515	0.00364583	0.334923	Not-significant
BBS2	-0.567027	-3.76664	0.000213796	0.00364583	0.33372	Not-significant
PHF13	0.849011	3.76659	0.000213834	0.00364583	0.333554	Not-significant
STPG3	0.248033	3.76617	0.000214171	0.00364589	0.332113	Not-significant
CLK1	-0.681997	-3.76611	0.000214218	0.00364589	0.331912	Not-significant
LINC00672	-0.286628	-3.76559	0.000214638	0.00364981	0.330117	Not-significant
WDR13	-0.456362	-3.76519	0.000214965	0.00365212	0.328725	Not-significant
GOLGA3	-0.549671	-3.76415	0.000215799	0.00366305	0.325177	Not-significant
OR5AC2	0.240946	3.76238	0.000217242	0.00368427	0.319075	Not-significant
TMEM211	-0.312328	-3.76116	0.000218237	0.00369788	0.31489	Not-significant
ORMDL1	-0.558647	-3.76003	0.000219165	0.00370766	0.311001	Not-significant
SUMO2	-0.753554	-3.75998	0.000219201	0.00370766	0.310854	Not-significant
RTN4RL2	0.212636	3.75875	0.000220216	0.00372155	0.306622	Not-significant
USP35	0.245126	3.75789	0.00022093	0.00373033	0.303657	Not-significant
SOWAHA	-1.04008	-3.75745	0.000221289	0.00373312	0.302169	Down-regulated
UGDH	-0.666726	-3.75694	0.000221713	0.00373697	0.300419	Not-significant
SART1	0.241494	3.75631	0.000222238	0.00374254	0.298252	Not-significant
LAMC2	1.29224	3.75452	0.000223734	0.00376442	0.292111	Up-regulated
RERE	-0.565677	-3.75306	0.000224963	0.00378178	0.287094	Not-significant
CTAG1B	0.203939	3.7522	0.000225689	0.00379066	0.284145	Not-significant
BMP6	-0.539743	-3.75123	0.000226503	0.0037992	0.280847	Not-significant
SDHD	-0.624261	-3.75113	0.000226593	0.0037992	0.280482	Not-significant
USO1	-0.438252	-3.75005	0.000227512	0.00381127	0.276779	Not-significant
MTSS1	-0.857318	-3.74953	0.000227954	0.00381535	0.275	Not-significant
SMIM7	-0.427929	-3.74872	0.00022864	0.0038235	0.272248	Not-significant
LPCAT1	0.850979	3.74701	0.000230107	0.00384468	0.266393	Not-significant
MED23	-0.408214	-3.74638	0.000230653	0.00384947	0.264226	Not-significant
PDE10A	0.207522	3.74588	0.000231087	0.00384947	0.262506	Not-significant
TBL3	0.465852	3.74585	0.000231105	0.00384947	0.262435	Not-significant
DYRK1B	-0.450566	-3.74559	0.00023133	0.00384947	0.261541	Not-significant
SYNGR2	0.252516	3.74547	0.000231435	0.00384947	0.261126	Not-significant
ZNF18	-0.391285	-3.74528	0.000231598	0.00384947	0.260481	Not-significant
CFAP61	0.245754	3.74505	0.000231799	0.00384947	0.259689	Not-significant
CEP63	-0.404054	-3.74344	0.0002332	0.00386642	0.254172	Not-significant
SCGB2A1	-1.89609	-3.74328	0.000233338	0.00386642	0.253631	Down-regulated
C8orf88	0.24597	3.74318	0.000233425	0.00386642	0.253291	Not-significant
MAT2B	-0.519914	-3.74226	0.000234232	0.00387644	0.250131	Not-significant
BEST1	0.379192	3.74111	0.000235242	0.00388596	0.246193	Not-significant
GUCY1A2	0.238106	3.74095	0.000235382	0.00388596	0.245647	Not-significant
RAB43	0.211287	3.74089	0.000235429	0.00388596	0.245464	Not-significant
ANKRD22	-1.35415	-3.74068	0.000235617	0.00388596	0.244733	Down-regulated
RASGRF2	0.19695	3.73981	0.000236383	0.00389524	0.241764	Not-significant
MILR1	0.376807	3.73931	0.000236821	0.0038991	0.24007	Not-significant
HFE	0.201681	3.73711	0.000238776	0.00392793	0.232543	Not-significant
SRGAP2	-0.387007	-3.73627	0.000239528	0.00393692	0.229667	Not-significant
SNX2	-0.589571	-3.73542	0.000240287	0.00394601	0.226773	Not-significant
KBTBD7	-0.470886	-3.7347	0.000240933	0.00394947	0.224314	Not-significant
ANKHD1	-0.424819	-3.73462	0.000241005	0.00394947	0.224042	Not-significant
H2BC17	0.223262	3.7345	0.000241115	0.00394947	0.223623	Not-significant
DMXL1	-0.581053	-3.73374	0.000241793	0.00395719	0.221055	Not-significant
KIAA1549	0.227658	3.73062	0.00024462	0.00399822	0.210415	Not-significant
BRD7P3	-0.370488	-3.73052	0.000244717	0.00399822	0.210055	Not-significant
ZNF527	0.292021	3.72943	0.000245712	0.00400376	0.206342	Not-significant
PRDM15	0.183795	3.72904	0.00024607	0.00400376	0.20501	Not-significant
WDR77	-0.403737	-3.72899	0.000246109	0.00400376	0.204863	Not-significant
ANKRD45	0.188035	3.72898	0.000246122	0.00400376	0.204815	Not-significant
TFR2	-0.295606	-3.72886	0.000246229	0.00400376	0.204419	Not-significant
TUBE1	-0.434901	-3.72878	0.000246308	0.00400376	0.204124	Not-significant
OXA1L	-0.548481	-3.72682	0.000248114	0.0040297	0.19744	Not-significant
FAM227A	0.201599	3.7259	0.000248961	0.00403958	0.19432	Not-significant
FNDC11	0.283048	3.7257	0.000249144	0.00403958	0.193651	Not-significant
ISCA1	-0.61532	-3.72488	0.000249911	0.00404802	0.190838	Not-significant
TMEM158	1.13474	3.72469	0.000250086	0.00404802	0.190196	Up-regulated
WFDC6	0.206569	3.72407	0.000250658	0.00405386	0.188106	Not-significant
NLRP10	0.16119	3.72339	0.000251296	0.00406075	0.185781	Not-significant
BIVM	-0.526172	-3.7223	0.000252318	0.00407383	0.182068	Not-significant
MBTPS1	-0.48674	-3.71957	0.000254889	0.00411062	0.172794	Not-significant
POLR3G	0.222933	3.71943	0.000255025	0.00411062	0.172306	Not-significant
SLC25A46	-0.568238	-3.71889	0.00025554	0.00411545	0.170462	Not-significant
LMO4	-0.715757	-3.71826	0.000256139	0.00412165	0.168319	Not-significant
COX6A1	-0.634621	-3.71632	0.000257993	0.004148	0.161723	Not-significant
CDC42	-0.548414	-3.71489	0.000259364	0.00416654	0.156876	Not-significant
PLVAP	-1.08974	-3.71446	0.000259774	0.00416964	0.155431	Down-regulated
ATP11AUN	0.189649	3.71364	0.000260573	0.00417849	0.152622	Not-significant
LOC286177	0.206719	3.71344	0.000260761	0.00417849	0.151961	Not-significant
SMYD2	-0.578901	-3.71318	0.000261011	0.00417901	0.151084	Not-significant
HPGD	-1.79253	-3.71244	0.000261736	0.00418711	0.14855	Down-regulated
TXNL4A	0.280088	3.71149	0.000262657	0.00419836	0.145335	Not-significant
CA2	-2.22394	-3.7107	0.000263432	0.00420723	0.142642	Down-regulated
YY2	0.197927	3.71026	0.000263859	0.00420833	0.14116	Not-significant
PELP1	0.798426	3.71018	0.000263939	0.00420833	0.140881	Not-significant
SLC10A5	0.197359	3.70901	0.000265084	0.00422044	0.136923	Not-significant
ZNF75A	-0.501329	-3.70896	0.000265139	0.00422044	0.136734	Not-significant
NT5C1B	0.217711	3.70823	0.000265853	0.0042283	0.134274	Not-significant
EEA1	0.28404	3.70765	0.000266425	0.00423388	0.13231	Not-significant
SH3GLB2	-0.552082	-3.70508	0.000268976	0.00427089	0.123595	Not-significant
CBLB	-0.645249	-3.70337	0.000270688	0.00429452	0.117794	Not-significant
PPP2R1B	-0.448204	-3.70183	0.000272231	0.00431543	0.112597	Not-significant
PNLIPRP3	0.194712	3.70143	0.000272635	0.00431664	0.111243	Not-significant
MTX2	-0.548469	-3.70131	0.000272758	0.00431664	0.110831	Not-significant
NFX1	-0.404115	-3.70048	0.000273601	0.00432385	0.108008	Not-significant
ATXN10	-0.324314	-3.70042	0.000273664	0.00432385	0.107798	Not-significant
RPL8	0.479586	3.7	0.000274084	0.00432523	0.106396	Not-significant
SYTL1	-0.858382	-3.69989	0.000274202	0.00432523	0.106001	Not-significant
CELA3A	-1.27335	-3.69786	0.000276266	0.0043542	0.099147	Down-regulated
ERGIC2	-0.647175	-3.69727	0.000276865	0.00436005	0.0971682	Not-significant
PALS1	-0.493436	-3.69614	0.000278026	0.00437474	0.0933422	Not-significant
OR4A5	0.192215	3.69549	0.000278702	0.00437948	0.0911198	Not-significant
UPP1	0.936106	3.69536	0.00027883	0.00437948	0.0907015	Up-regulated
SAV1	-0.52058	-3.69495	0.000279252	0.00437948	0.0893183	Not-significant
PI4KB	-0.38153	-3.69491	0.000279298	0.00437948	0.0891686	Not-significant
TRIM53AP	0.193592	3.69468	0.000279537	0.00437948	0.0883862	Not-significant
RUNDC1	-0.470837	-3.69452	0.000279696	0.00437948	0.0878653	Not-significant
CREB3L2	-0.5797	-3.69384	0.000280405	0.00438699	0.085552	Not-significant
CLASRP	-0.396979	-3.69183	0.000282491	0.00441603	0.0787766	Not-significant
BEX5	-0.692847	-3.69158	0.000282754	0.00441654	0.0779262	Not-significant
MKLN1	-0.424893	-3.69018	0.000284219	0.0044358	0.0732056	Not-significant
TRIP11	-0.492063	-3.68965	0.000284784	0.00444102	0.0713877	Not-significant
HOXA11	0.307919	3.68933	0.000285115	0.00444256	0.0703276	Not-significant
LINC00839	0.213067	3.68911	0.000285353	0.00444266	0.0695654	Not-significant
FKBP3	-0.547488	-3.68823	0.000286275	0.0044534	0.0666169	Not-significant
DBH	0.210156	3.6879	0.000286623	0.0044552	0.0655062	Not-significant
TMED7	-0.64586	-3.68667	0.000287934	0.00446901	0.061336	Not-significant
ENPP4	-0.66295	-3.68663	0.000287978	0.00446901	0.0611969	Not-significant
GPRC5B	-0.739183	-3.68639	0.000288232	0.00446934	0.0603903	Not-significant
BPIFB3	0.187204	3.68583	0.000288827	0.00447495	0.058505	Not-significant
UQCRBP1	-0.672664	-3.68535	0.00028934	0.00447568	0.0568837	Not-significant
SSH1	0.377174	3.68535	0.000289341	0.00447568	0.0568807	Not-significant
CD109	0.313501	3.68391	0.00029088	0.00449586	0.052034	Not-significant
LINGO2	-0.580637	-3.68322	0.000291618	0.00450365	0.0497167	Not-significant
HPCAL1	-0.711979	-3.68294	0.000291925	0.00450476	0.0487562	Not-significant
ABCC5	-0.977293	-3.68142	0.00029356	0.00452634	0.0436534	Down-regulated
OTOA	0.23436	3.68099	0.000294026	0.00452709	0.042203	Not-significant
OARD1	-0.584333	-3.68094	0.00029408	0.00452709	0.0420342	Not-significant
CS	-0.565284	-3.68058	0.000294475	0.00452953	0.040808	Not-significant
CENPI	0.293963	3.6792	0.000295972	0.00454891	0.0361764	Not-significant
UGCG	-0.973853	-3.67864	0.000296591	0.00455426	0.0342655	Down-regulated
MAP7D2	-0.824703	-3.67845	0.000296795	0.00455426	0.0336392	Not-significant
ING3	-0.39287	-3.67685	0.00029855	0.004575	0.0282511	Not-significant
GABARAPL1	-0.885465	-3.67671	0.000298705	0.004575	0.0277789	Not-significant
NKAIN3	0.220605	3.67657	0.000298862	0.004575	0.027296	Not-significant
SAMD4A	0.460942	3.67591	0.000299583	0.00458238	0.0250956	Not-significant
FGG	-1.02444	-3.67553	0.000300001	0.00458512	0.0238208	Down-regulated
PACRGL	0.195043	3.67467	0.000300961	0.00459612	0.0209044	Not-significant
TERT	0.187394	3.67363	0.000302112	0.00460767	0.0174172	Not-significant
OR9G4	0.19485	3.67355	0.000302198	0.00460767	0.0171569	Not-significant
SERPINB8	0.57316	3.67288	0.00030295	0.00461548	0.0148844	Not-significant
CCNT2	-0.391427	-3.67245	0.000303431	0.00461664	0.0134352	Not-significant
HUS1	0.184739	3.67238	0.000303508	0.00461664	0.0132056	Not-significant
UBE3A	-0.393427	-3.67166	0.000304314	0.00462524	0.0107809	Not-significant
PFKL	-0.734322	-3.67081	0.000305267	0.00463266	0.00792582	Not-significant
PCDHA10	0.213564	3.67079	0.000305285	0.00463266	0.00787055	Not-significant
GADD45A	-0.676682	-3.66887	0.000307446	0.00466176	0.00142862	Not-significant
TBCB	0.785694	3.66812	0.000308298	0.00467098	-0.00109764	Not-significant
RSRC2	-0.4973	-3.66773	0.000308741	0.004674	-0.00241104	Not-significant
CDSN	0.205109	3.66566	0.000311102	0.00470603	-0.00936924	Not-significant
ANAPC16	-0.546572	-3.66033	0.000317251	0.00479237	-0.0272436	Not-significant
ANKRA2	-0.495613	-3.66028	0.00031731	0.00479237	-0.0274118	Not-significant
ALKAL2	-0.755994	-3.65819	0.000319761	0.00482559	-0.0344389	Not-significant
CTNNBIP1	-0.610843	-3.6576	0.000320443	0.0048321	-0.0363864	Not-significant
SPHK1	0.918569	3.65702	0.000321127	0.0048386	-0.0383329	Up-regulated
ZFAND1	-0.514787	-3.65633	0.00032194	0.00484704	-0.040641	Not-significant
MRPS25	-0.486736	-3.6545	0.000324113	0.0048731	-0.0467832	Not-significant
BGN	1.59526	3.65444	0.000324179	0.0048731	-0.0469693	Up-regulated
LUC7L3	-0.684592	-3.65346	0.000325347	0.00488441	-0.050253	Not-significant
TSPAN12	-0.763072	-3.65339	0.00032544	0.00488441	-0.0505147	Not-significant
ZNF395	-0.543132	-3.65186	0.000327262	0.0049079	-0.0556102	Not-significant
LINC02171	0.197295	3.65049	0.000328914	0.00492883	-0.0602088	Not-significant
ADAMTS7	0.350328	3.64972	0.000329843	0.00493889	-0.0627822	Not-significant
RWDD2B	-0.272894	-3.64912	0.000330572	0.00494595	-0.0647978	Not-significant
NAA80	-0.450417	-3.64769	0.000332301	0.00496794	-0.0695592	Not-significant
PRSS41	0.205244	3.64732	0.000332748	0.00497074	-0.0707861	Not-significant
ID1	-1.16503	-3.64696	0.000333195	0.00497354	-0.0720112	Down-regulated
DGKK	0.193276	3.64505	0.000335528	0.00500449	-0.0783823	Not-significant
WDR44	-0.399375	-3.64376	0.000337117	0.00502427	-0.0826933	Not-significant
GLCCI1	-0.339788	-3.64318	0.000337833	0.00503104	-0.0846316	Not-significant
FAM90A8P	0.170165	3.64219	0.000339053	0.00504529	-0.0879218	Not-significant
TXLNGY	-1.07981	-3.64165	0.000339728	0.00505141	-0.0897345	Down-regulated
FAM78B	0.32155	3.64128	0.000340186	0.00505388	-0.0909642	Not-significant
ZNF839	-0.46846	-3.64109	0.000340421	0.00505388	-0.0915949	Not-significant
CLCN5	0.252386	3.64059	0.000341044	0.00505632	-0.0932654	Not-significant
C5orf34	0.409126	3.64054	0.000341112	0.00505632	-0.0934472	Not-significant
KRTAP19-4	0.193831	3.63996	0.000341835	0.00506312	-0.0953787	Not-significant
SIPA1L3	-0.556045	-3.63952	0.00034239	0.00506742	-0.0968586	Not-significant
DRC1	0.207419	3.6384	0.000343789	0.00508421	-0.10058	Not-significant
SAG	0.209144	3.63796	0.000344347	0.00508599	-0.102061	Not-significant
PCDHB8	0.233213	3.63788	0.00034444	0.00508599	-0.102307	Not-significant
PSMC4	0.720075	3.63757	0.000344831	0.00508786	-0.103343	Not-significant
FUNDC2P2	0.172512	3.63505	0.000348017	0.00513092	-0.111736	Not-significant
MT1F	-1.23105	-3.63304	0.000350585	0.00516217	-0.118443	Down-regulated
PCDHA8	0.184247	3.63297	0.000350676	0.00516217	-0.118679	Not-significant
IFIT3	0.953056	3.63217	0.000351698	0.00517325	-0.121335	Up-regulated
ZAR1	0.217337	3.63006	0.00035442	0.0052093	-0.128371	Not-significant
EXOC1	-0.459923	-3.6294	0.000355277	0.00521204	-0.130574	Not-significant
KIF13A	0.208781	3.6293	0.000355407	0.00521204	-0.130906	Not-significant
UBLCP1	-0.453759	-3.62929	0.000355422	0.00521204	-0.130945	Not-significant
OGDH	-0.589461	-3.6284	0.000356571	0.00522157	-0.133891	Not-significant
HIPK3	0.255709	3.62837	0.000356616	0.00522157	-0.134005	Not-significant
BCKDHA	-0.590313	-3.62782	0.000357329	0.00522569	-0.135827	Not-significant
PARP6	-0.511889	-3.62773	0.000357442	0.00522569	-0.136116	Not-significant
CRYM	0.261531	3.62739	0.000357891	0.00522826	-0.137261	Not-significant
LINC00471	0.203697	3.62596	0.000359763	0.00525161	-0.142021	Not-significant
AIFM1	-0.652994	-3.62494	0.000361094	0.00526703	-0.145389	Not-significant
MEPE	0.209416	3.62446	0.000361731	0.00527231	-0.146997	Not-significant
ELAPOR1	-1.81072	-3.6233	0.000363258	0.00529055	-0.150841	Down-regulated
LINC02774	0.20436	3.62275	0.000363989	0.00529718	-0.152674	Not-significant
SNORD38A	-0.508476	-3.62186	0.000365168	0.00530742	-0.155623	Not-significant
MYT1L	0.203602	3.62181	0.000365247	0.00530742	-0.155819	Not-significant
GPR152	0.212727	3.62127	0.000365965	0.00531178	-0.157612	Not-significant
OR7E24	0.171767	3.62104	0.000366269	0.00531178	-0.158369	Not-significant
CBS	-1.00517	-3.62069	0.000366737	0.00531178	-0.159533	Down-regulated
NEMP2	0.234432	3.62055	0.000366917	0.00531178	-0.15998	Not-significant
KLRB1	-1.14135	-3.62047	0.000367032	0.00531178	-0.160267	Down-regulated
ARGFXP2	0.218816	3.62014	0.000367469	0.00531178	-0.161352	Not-significant
STRN	-0.567773	-3.61974	0.000368006	0.00531178	-0.162684	Not-significant
SEC16A	-0.646862	-3.61972	0.000368028	0.00531178	-0.162739	Not-significant
PLEKHA6	-0.732818	-3.61971	0.000368039	0.00531178	-0.162766	Not-significant
ZBTB3	-0.383415	-3.61947	0.000368365	0.00531249	-0.163574	Not-significant
CYP2C18	-1.6507	-3.61859	0.000369542	0.00532546	-0.166484	Down-regulated
EBF2	0.289381	3.61798	0.000370361	0.00533326	-0.168503	Not-significant
BLOC1S2	0.196483	3.6169	0.000371829	0.00535038	-0.17211	Not-significant
TENT2	-0.489175	-3.61569	0.000373462	0.00536984	-0.176106	Not-significant
PROM2	-1.59632	-3.6142	0.000375493	0.00539398	-0.181052	Down-regulated
RARRES1	1.47648	3.61405	0.000375703	0.00539398	-0.181562	Up-regulated
ALAD	-0.564599	-3.61294	0.000377213	0.0054116	-0.185219	Not-significant
FHDC1	-0.491405	-3.61233	0.000378053	0.0054196	-0.187248	Not-significant
H2BW4P	0.194356	3.6121	0.000378371	0.00542011	-0.188014	Not-significant
LGALS8-AS1	0.228776	3.61184	0.000378724	0.00542113	-0.188866	Not-significant
STKLD1	0.217554	3.61153	0.000379163	0.00542336	-0.189922	Not-significant
MACIR	-0.725465	-3.61015	0.000381059	0.00544564	-0.19447	Not-significant
C9orf153	0.190555	3.60991	0.000381392	0.00544564	-0.195266	Not-significant
TOMM20L	0.180176	3.60969	0.000381696	0.00544564	-0.195993	Not-significant
ZFAND2B	-0.486408	-3.60958	0.000381856	0.00544564	-0.196376	Not-significant
KCNC2	0.212588	3.60799	0.000384058	0.00547297	-0.201618	Not-significant
CNOT8	-0.425252	-3.60666	0.000385921	0.00549319	-0.206029	Not-significant
PTMA	-0.90229	-3.60657	0.00038605	0.00549319	-0.206335	Down-regulated
KCNE5	0.184025	3.6063	0.000386431	0.00549453	-0.207233	Not-significant
KCTD18	-0.415894	-3.60608	0.000386741	0.00549488	-0.207966	Not-significant
TNKS	0.231833	3.60535	0.000387767	0.00550228	-0.210381	Not-significant
GDI2	-0.461559	-3.6053	0.000387836	0.00550228	-0.210542	Not-significant
GRSF1	-0.481105	-3.60393	0.000389767	0.005523	-0.21507	Not-significant
B4GALT3	-0.618026	-3.60385	0.000389872	0.005523	-0.215317	Not-significant
CIPC	-0.571282	-3.60328	0.000390684	0.00553041	-0.217212	Not-significant
WDR48	-0.623303	-3.60204	0.000392445	0.00555124	-0.221312	Not-significant
PRLH	0.181521	3.60142	0.000393325	0.00555959	-0.223354	Not-significant
DAP3	0.831482	3.60015	0.000395138	0.00558111	-0.227547	Not-significant
HRH3	0.18195	3.59925	0.000396441	0.00559539	-0.230547	Not-significant
AHSA2P	-0.639651	-3.59866	0.000397286	0.00560319	-0.232488	Not-significant
TMTC2	-0.367267	-3.59734	0.000399191	0.00562592	-0.236847	Not-significant
KIF1C	-0.547579	-3.59687	0.000399868	0.00563133	-0.238393	Not-significant
TFF2	-3.00795	-3.59621	0.000400823	0.00564063	-0.240566	Down-regulated
AKAP8	-0.43885	-3.59511	0.000402427	0.00565906	-0.244207	Not-significant
TPRG1	0.2393	3.59462	0.000403137	0.00566489	-0.245814	Not-significant
MECOM	-1.07447	-3.59416	0.000403814	0.00566829	-0.247343	Down-regulated
CTTNBP2NL	0.411472	3.59405	0.00040397	0.00566829	-0.247695	Not-significant
EIF2A	-0.584112	-3.59324	0.000405163	0.00568088	-0.250383	Not-significant
ACTBL2	0.205175	3.59176	0.000407335	0.00570486	-0.255254	Not-significant
CYP2R1	-0.389664	-3.59135	0.000407937	0.00570486	-0.2566	Not-significant
OR5T2	0.213303	3.59127	0.000408053	0.00570486	-0.256859	Not-significant
IFNB1	0.198501	3.59127	0.000408064	0.00570486	-0.256884	Not-significant
TEX37	0.226367	3.59095	0.000408536	0.00570731	-0.257937	Not-significant
PAPOLA	-0.397625	-3.59046	0.000409249	0.00571311	-0.259527	Not-significant
C21orf91-OT1	0.226722	3.58965	0.000410463	0.00572589	-0.262226	Not-significant
KRTAP4-1	0.199263	3.5892	0.000411122	0.00572682	-0.263688	Not-significant
RUVBL1	0.633984	3.5892	0.000411127	0.00572682	-0.263698	Not-significant
AREG	0.195658	3.58873	0.000411821	0.00573232	-0.265235	Not-significant
SLC25A21	0.250838	3.5883	0.000412461	0.00573707	-0.26665	Not-significant
CD320	-0.816526	-3.58803	0.000412867	0.00573855	-0.267546	Not-significant
RBFA	0.390177	3.58739	0.000413822	0.00574767	-0.269653	Not-significant
MAPRE3	-0.474616	-3.58678	0.000414732	0.00575613	-0.271653	Not-significant
PLCZ1	0.193616	3.5859	0.000416063	0.00577044	-0.274574	Not-significant
GRM7	0.182288	3.58502	0.00041738	0.00578451	-0.277452	Not-significant
DOC2B	0.244639	3.58459	0.000418036	0.00578942	-0.278882	Not-significant
PIGP	-0.609965	-3.5843	0.000418471	0.00579126	-0.27983	Not-significant
CCDC38	0.183912	3.58379	0.000419249	0.00579768	-0.281523	Not-significant
PAN3	-0.508912	-3.58359	0.000419539	0.00579768	-0.282154	Not-significant
DIPK2A	-0.587151	-3.58304	0.00042038	0.00580512	-0.283978	Not-significant
TIMP1	1.12757	3.58231	0.000421486	0.0058162	-0.286371	Up-regulated
MRPS36	-0.439281	-3.58211	0.000421792	0.00581624	-0.287033	Not-significant
OR51B4	0.18337	3.58188	0.000422149	0.00581698	-0.287802	Not-significant
ZNF558	-0.416782	-3.58006	0.000424922	0.00584717	-0.293767	Not-significant
TECTB	0.195587	3.58005	0.00042495	0.00584717	-0.293827	Not-significant
ANK3	-0.712521	-3.57885	0.000426791	0.00586471	-0.297766	Not-significant
CTNNA3	0.234087	3.57882	0.000426835	0.00586471	-0.29786	Not-significant
ADH1A	-2.05853	-3.57825	0.000427715	0.00587258	-0.299735	Down-regulated
YTHDF2	-0.560752	-3.57785	0.000428328	0.0058768	-0.301041	Not-significant
IL3	0.232601	3.57666	0.000430172	0.00589466	-0.304952	Not-significant
SOCS4	-0.440801	-3.57661	0.000430244	0.00589466	-0.305107	Not-significant
ARHGDIG	-0.837827	-3.57552	0.000431949	0.00591378	-0.308708	Not-significant
MUS81	-0.353229	-3.57494	0.00043285	0.00591998	-0.310606	Not-significant
SOX2	-1.14674	-3.57483	0.000433019	0.00591998	-0.310961	Down-regulated
CHIAP2	-0.329762	-3.57394	0.000434414	0.00593482	-0.313891	Not-significant
MFAP2	0.81562	3.57271	0.000436336	0.00595684	-0.317912	Not-significant
TCEA3	-1.1234	-3.57199	0.000437471	0.00596808	-0.320277	Down-regulated
TRIP12	-0.468692	-3.57147	0.000438297	0.0059751	-0.321995	Not-significant
ACVR2A	-0.39976	-3.5701	0.000440462	0.00600036	-0.326483	Not-significant
TBX5	0.203244	3.56959	0.000441278	0.0060072	-0.328168	Not-significant
CHRNB2	0.16918	3.5688	0.000442525	0.00601991	-0.330738	Not-significant
HERC1	-0.547262	-3.56832	0.000443296	0.00602159	-0.332324	Not-significant
ZNF204P	-0.460005	-3.56826	0.000443387	0.00602159	-0.33251	Not-significant
MRFAP1L1	-0.450721	-3.56814	0.00044359	0.00602159	-0.332928	Not-significant
HMX1	0.249304	3.56739	0.000444784	0.00603353	-0.335376	Not-significant
MAOA	-1.27649	-3.56645	0.000446287	0.00604963	-0.338447	Down-regulated
SLC22A5	-0.574595	-3.56565	0.000447573	0.00606278	-0.341067	Not-significant
NADK	-0.463776	-3.56528	0.000448167	0.00606654	-0.342274	Not-significant
TTLL11	0.244809	3.56496	0.00044869	0.00606735	-0.343337	Not-significant
ERGIC1	-0.756669	-3.56486	0.00044886	0.00606735	-0.343681	Not-significant
SLU7	-0.472368	-3.56451	0.000449425	0.00607072	-0.344828	Not-significant
OSMR	0.472175	3.564	0.000450242	0.00607353	-0.346481	Not-significant
PCDHGB6	-0.349919	-3.56399	0.000450267	0.00607353	-0.346531	Not-significant
MFSD8	-0.4026	-3.56323	0.000451497	0.00608298	-0.349016	Not-significant
ITGA5	1.17851	3.56316	0.000451602	0.00608298	-0.349226	Up-regulated
NFE2L1	-0.516397	-3.56276	0.000452248	0.00608741	-0.350527	Not-significant
WDR6	-0.514276	-3.56221	0.000453143	0.00609519	-0.352328	Not-significant
ATP5F1A	-0.514375	-3.5616	0.00045414	0.00610432	-0.35433	Not-significant
VPS35L	-0.38352	-3.56091	0.000455268	0.00611237	-0.356588	Not-significant
CLEC5A	0.467257	3.5607	0.000455615	0.00611237	-0.357282	Not-significant
PRELID2	-0.512568	-3.56065	0.000455695	0.00611237	-0.357441	Not-significant
ASF1A	-0.440931	-3.55922	0.000458045	0.0061396	-0.362124	Not-significant
EPS15	-0.44667	-3.55766	0.000460628	0.00616991	-0.367244	Not-significant
ISOC1	-0.606029	-3.55738	0.000461085	0.00617172	-0.368146	Not-significant
PACRG-AS1	0.160592	3.55627	0.000462922	0.00619199	-0.371766	Not-significant
CHMP4A	-0.367638	-3.55539	0.000464396	0.00620685	-0.37466	Not-significant
FNDC9	0.240646	3.55522	0.000464681	0.00620685	-0.375217	Not-significant
FER1L4	-1.38821	-3.55403	0.000466665	0.00622902	-0.379095	Down-regulated
SLC7A13	0.207577	3.55347	0.000467595	0.0062371	-0.380909	Not-significant
TAF11	0.192751	3.55284	0.000468657	0.00624691	-0.382972	Not-significant
GUCY1B2	0.243982	3.55258	0.000469101	0.0062485	-0.383835	Not-significant
ATP5MG	-0.420186	-3.5516	0.000470758	0.00625864	-0.387044	Not-significant
FLVCR1	-0.550103	-3.55137	0.000471144	0.00625864	-0.38779	Not-significant
CGREF1	0.236323	3.55117	0.00047147	0.00625864	-0.38842	Not-significant
KLHL3	-0.604695	-3.55107	0.000471646	0.00625864	-0.388759	Not-significant
UVSSA	-0.793435	-3.55098	0.000471801	0.00625864	-0.389059	Not-significant
CCDC185	0.230577	3.55097	0.00047182	0.00625864	-0.389096	Not-significant
LEPR	-1.35378	-3.55063	0.000472382	0.00626176	-0.390179	Down-regulated
GOLGA8G	0.191966	3.54978	0.000473837	0.0062767	-0.392977	Not-significant
ZNF579	-0.50649	-3.54952	0.000474282	0.00627827	-0.393832	Not-significant
SRRM1	-0.443686	-3.54859	0.000475865	0.00629487	-0.396863	Not-significant
RNPC3	-0.425838	-3.54816	0.000476598	0.00630022	-0.398264	Not-significant
EDARADD	-0.730983	-3.54751	0.00047771	0.00631058	-0.400386	Not-significant
B3GNT9	0.198878	3.54673	0.000479038	0.00631998	-0.402912	Not-significant
HORMAD2	0.194917	3.54671	0.000479081	0.00631998	-0.402993	Not-significant
ACCS	-0.507847	-3.54635	0.0004797	0.0063238	-0.404169	Not-significant
ASB16	-0.58511	-3.54592	0.000480426	0.00632902	-0.405545	Not-significant
COMMD1	-0.385266	-3.54551	0.000481146	0.00633416	-0.406908	Not-significant
FLG2	0.179477	3.54415	0.000483497	0.00636073	-0.411342	Not-significant
FBXO46	-0.519752	-3.54355	0.000484526	0.00636855	-0.413278	Not-significant
USP3	-0.565024	-3.54337	0.000484844	0.00636855	-0.413874	Not-significant
SRP68	-0.419949	-3.54323	0.000485087	0.00636855	-0.41433	Not-significant
ABCA2	-0.65501	-3.54263	0.000486121	0.00637366	-0.416268	Not-significant
ZNF765	0.19017	3.54262	0.000486141	0.00637366	-0.416305	Not-significant
C7orf61	0.193558	3.53987	0.000490946	0.00643226	-0.425254	Not-significant
RFK	-0.747706	-3.53894	0.000492585	0.00644355	-0.428285	Not-significant
PPIP5K1	-0.42826	-3.5389	0.000492657	0.00644355	-0.42842	Not-significant
DNM2	-0.761496	-3.53873	0.000492965	0.00644355	-0.428988	Not-significant
RAPGEF2	0.161611	3.53862	0.000493151	0.00644355	-0.429331	Not-significant
SMAD7	-0.472563	-3.53806	0.000494139	0.00645206	-0.431152	Not-significant
HTR2A	-0.472795	-3.53722	0.000495622	0.00646702	-0.433878	Not-significant
LINC00326	0.15591	3.53518	0.000499265	0.00651012	-0.440539	Not-significant
RTL1	0.192356	3.5349	0.000499763	0.0065122	-0.441447	Not-significant
LINC00668	0.183814	3.53277	0.000503574	0.0065574	-0.448357	Not-significant
KCNQ5	0.231443	3.53061	0.000507478	0.00660289	-0.455382	Not-significant
GALP	0.233699	3.53046	0.000507756	0.00660289	-0.455879	Not-significant
PDIA5	-0.755838	-3.52905	0.000510306	0.00663045	-0.460436	Not-significant
MEST	0.336927	3.52891	0.000510566	0.00663045	-0.460899	Not-significant
ANKAR	-0.378437	-3.52811	0.00051203	0.00664496	-0.463503	Not-significant
TAF7L	0.226738	3.52776	0.000512664	0.00664689	-0.464628	Not-significant
S1PR2	0.2233	3.52765	0.000512872	0.00664689	-0.464998	Not-significant
ZNF550	0.189531	3.52721	0.000513667	0.00664936	-0.466406	Not-significant
FOXH1	0.232637	3.52716	0.000513756	0.00664936	-0.466563	Not-significant
MAL	-1.60878	-3.5265	0.000514967	0.00666054	-0.468705	Down-regulated
FOXS1	0.67679	3.52606	0.000515778	0.00666654	-0.470136	Not-significant
SF3B1	-0.581488	-3.52553	0.000516758	0.00667416	-0.471862	Not-significant
TMEM33	-0.591425	-3.52529	0.000517204	0.00667416	-0.472647	Not-significant
ENPP2	-0.982412	-3.52516	0.000517447	0.00667416	-0.473074	Down-regulated
MRE11	0.460804	3.52499	0.00051776	0.00667416	-0.473623	Not-significant
MBL2	0.235012	3.52411	0.000519383	0.00669059	-0.47647	Not-significant
PDHX	-0.776056	-3.52304	0.000521371	0.00671064	-0.479943	Not-significant
CYTIP	-0.863868	-3.52273	0.00052195	0.00671064	-0.480952	Not-significant
UQCRQ	-0.544144	-3.52251	0.00052235	0.00671064	-0.48165	Not-significant
PNRC2	-0.436432	-3.52245	0.000522472	0.00671064	-0.481862	Not-significant
GUCY1B1	0.454792	3.52233	0.000522689	0.00671064	-0.48224	Not-significant
MDGA1	0.23283	3.52186	0.000523565	0.00671332	-0.483762	Not-significant
LRRC17	-0.989256	-3.52184	0.000523598	0.00671332	-0.483819	Down-regulated
NDUFS4	-0.535759	-3.52124	0.000524718	0.00672319	-0.485762	Not-significant
CREBZF	-0.442334	-3.52104	0.000525096	0.00672354	-0.486417	Not-significant
SLC2A10	-0.911432	-3.52083	0.000525485	0.00672403	-0.487089	Down-regulated
NET1	-0.678159	-3.51991	0.00052721	0.00674161	-0.49007	Not-significant
TUFM	-0.589403	-3.51829	0.00053027	0.0067747	-0.495331	Not-significant
GPR6	0.163698	3.51816	0.000530504	0.0067747	-0.495734	Not-significant
PDCD6IP	-0.556008	-3.51772	0.000531343	0.0067809	-0.49717	Not-significant
TFDP3	0.205712	3.51718	0.00053236	0.00678936	-0.498909	Not-significant
UBR7	-0.481776	-3.51665	0.000533371	0.00679774	-0.500633	Not-significant
FABP12	0.181936	3.51636	0.000533919	0.00680019	-0.501566	Not-significant
C8orf89	0.19459	3.51546	0.000535628	0.00681744	-0.504472	Not-significant
PHKG2	-0.40304	-3.51527	0.000536002	0.00681768	-0.505106	Not-significant
MORN1	0.188502	3.51504	0.000536434	0.00681865	-0.505839	Not-significant
SHOX	0.171568	3.51466	0.000537159	0.00682334	-0.507066	Not-significant
OSTC	-0.661627	-3.51327	0.000539827	0.0068527	-0.511571	Not-significant
RASAL1	-0.744085	-3.51147	0.0005433	0.00689168	-0.5174	Not-significant
EXOC4	-0.45398	-3.5113	0.000543617	0.00689168	-0.51793	Not-significant
ACTR3	-0.61599	-3.51073	0.000544716	0.00689624	-0.519766	Not-significant
RNF17	0.18531	3.51062	0.000544939	0.00689624	-0.520138	Not-significant
PRAM1	0.350123	3.51056	0.000545055	0.00689624	-0.520331	Not-significant
CCDC110	-0.456012	-3.50892	0.00054825	0.0069321	-0.525644	Not-significant
AKR1B10	-2.51257	-3.50581	0.000554327	0.00700432	-0.535663	Down-regulated
RHOT2	-0.548288	-3.5053	0.000555339	0.00701249	-0.53732	Not-significant
ALG5	-0.554024	-3.50468	0.000556558	0.00702324	-0.539311	Not-significant
GNG13	0.188935	3.50409	0.000557736	0.0070291	-0.541234	Not-significant
ST6GALNAC1	-1.38623	-3.50408	0.000557754	0.0070291	-0.541263	Down-regulated
SAFB2	-0.468974	-3.50328	0.000559333	0.00704437	-0.543832	Not-significant
PTH	0.190542	3.50132	0.000563242	0.00708895	-0.550161	Not-significant
GOLPH3L	-0.603331	-3.50028	0.000565325	0.0071105	-0.553515	Not-significant
APEH	-0.544731	-3.49989	0.000566094	0.00711466	-0.554749	Not-significant
C4orf19	-0.984337	-3.49974	0.000566398	0.00711466	-0.555238	Down-regulated
LYPD6	-0.589466	-3.49928	0.000567335	0.00712176	-0.55674	Not-significant
CBY3	0.197416	3.49876	0.000568382	0.00713024	-0.558414	Not-significant
TRPV4	0.249224	3.4982	0.000569513	0.00713976	-0.560221	Not-significant
CLTC	-0.578621	-3.49777	0.000570365	0.00714576	-0.561578	Not-significant
GPR135	0.192519	3.49759	0.000570738	0.00714577	-0.562173	Not-significant
NAV2-AS4	0.18338	3.49726	0.000571407	0.00714949	-0.563238	Not-significant
MRFAP1	0.706715	3.49649	0.00057296	0.00716424	-0.565703	Not-significant
OXR1	-0.572878	-3.4956	0.000574783	0.00718235	-0.568589	Not-significant
ANKRD20A11P	-0.524851	-3.49409	0.000577866	0.00721617	-0.573448	Not-significant
MGST1	-0.967274	-3.49326	0.00057957	0.00722633	-0.576124	Down-regulated
ZNF48	0.178845	3.49314	0.000579811	0.00722633	-0.576501	Not-significant
CALHM5	0.286277	3.49299	0.000580116	0.00722633	-0.576979	Not-significant
SPRR2C	0.209913	3.49284	0.000580421	0.00722633	-0.577457	Not-significant
CSRP3	0.201545	3.49277	0.000580563	0.00722633	-0.577679	Not-significant
H2BC1	0.191458	3.4924	0.000581333	0.00723122	-0.578882	Not-significant
ACADS	-0.787958	-3.49207	0.000582001	0.00723484	-0.579926	Not-significant
PPP4R4	-0.317062	-3.49165	0.000582879	0.00724074	-0.581296	Not-significant
MAGI1	-0.288794	-3.49148	0.000583231	0.00724074	-0.581843	Not-significant
MOCS3	0.239669	3.49117	0.000583874	0.0072432	-0.582844	Not-significant
SHANK2	-0.580307	-3.49096	0.000584294	0.0072432	-0.583498	Not-significant
RAB27B	-1.40448	-3.4905	0.000585246	0.0072432	-0.584976	Down-regulated
CTIF	-0.737985	-3.4903	0.000585677	0.0072432	-0.585646	Not-significant
SLC18B1	-0.602567	-3.49017	0.000585945	0.0072432	-0.58606	Not-significant
LRPPRC	-0.50489	-3.49009	0.000586106	0.0072432	-0.58631	Not-significant
NFAT5	0.434891	3.48993	0.00058644	0.0072432	-0.586827	Not-significant
USP8	-0.656186	-3.48992	0.00058645	0.0072432	-0.586843	Not-significant
PHACTR2	-0.565965	-3.4893	0.000587742	0.00724983	-0.588841	Not-significant
OR2AE1	0.198403	3.4893	0.000587742	0.00724983	-0.588843	Not-significant
FAM102A	-0.887035	-3.48864	0.000589117	0.0072576	-0.590965	Not-significant
NR2F2	-0.969276	-3.48863	0.000589129	0.0072576	-0.590984	Down-regulated
TRAPPC8	-0.401806	-3.4875	0.000591492	0.00728204	-0.594619	Not-significant
PTCRA	0.239629	3.48591	0.000594838	0.00731854	-0.599743	Not-significant
NEK1	-0.464845	-3.48546	0.000595771	0.00732519	-0.601166	Not-significant
TSPEAR	0.200606	3.48529	0.000596143	0.00732519	-0.601733	Not-significant
C9	0.179778	3.48507	0.000596599	0.0073261	-0.602427	Not-significant
SIK2	-0.295271	-3.4843	0.000598228	0.00734141	-0.604903	Not-significant
LRRC37BP1	0.220582	3.48398	0.000598907	0.00734504	-0.605934	Not-significant
TMEM134	-0.678551	-3.48317	0.00060062	0.00736124	-0.608527	Not-significant
ACSL3	-0.919814	-3.48299	0.000600996	0.00736124	-0.609095	Down-regulated
CLRN1	-0.282149	-3.48198	0.000603161	0.00738305	-0.612361	Not-significant
HSF2BP	0.314087	3.48153	0.00060412	0.00738975	-0.613803	Not-significant
MCCD1	0.178682	3.48136	0.000604479	0.00738975	-0.614343	Not-significant
KCTD3	-0.541383	-3.48103	0.000605174	0.00739353	-0.615386	Not-significant
LRIG2	-0.292611	-3.48034	0.000606647	0.00740681	-0.617594	Not-significant
PLPPR3	0.207933	3.47987	0.000607673	0.00741462	-0.619129	Not-significant
KLF2	-0.836924	-3.47947	0.000608515	0.00741645	-0.620386	Not-significant
GLUD1	-0.454116	-3.47944	0.000608596	0.00741645	-0.620507	Not-significant
CIB3	0.160479	3.47917	0.000609178	0.00741882	-0.621374	Not-significant
CTDSPL	-0.57346	-3.4785	0.000610608	0.00743152	-0.623503	Not-significant
MIR205HG	0.186372	3.47606	0.000615901	0.00748736	-0.63134	Not-significant
GKN1	-3.43032	-3.47602	0.000615977	0.00748736	-0.631451	Down-regulated
NKAPL	0.22797	3.47532	0.00061751	0.00750124	-0.633708	Not-significant
NXPE1	0.208527	3.47498	0.000618244	0.00750541	-0.634787	Not-significant
OR4N4	0.201002	3.47439	0.000619527	0.00751623	-0.636669	Not-significant
CBX7	-0.85659	-3.47337	0.000621755	0.00753759	-0.639928	Not-significant
MAP2K7	-0.32694	-3.47323	0.000622074	0.00753759	-0.640394	Not-significant
CCNC	-0.597473	-3.4728	0.000623008	0.00754041	-0.641755	Not-significant
KLF14	0.191517	3.47276	0.000623093	0.00754041	-0.641879	Not-significant
HSD3BP4	0.182372	3.4722	0.000624323	0.00754982	-0.64367	Not-significant
ICE1	-0.461044	-3.47199	0.000624806	0.00754982	-0.644371	Not-significant
C12orf42	0.174178	3.47187	0.000625051	0.00754982	-0.644728	Not-significant
GABRQ	0.174159	3.47134	0.000626226	0.00755925	-0.646432	Not-significant
HDAC2	-0.571869	-3.47036	0.000628406	0.00757357	-0.649586	Not-significant
KRTAP10-4	0.168152	3.47025	0.000628645	0.00757357	-0.649931	Not-significant
RNASEL	-0.46695	-3.47021	0.000628727	0.00757357	-0.65005	Not-significant
THY1	1.36159	3.47009	0.000628992	0.00757357	-0.650433	Up-regulated
PCED1A	-0.541809	-3.46969	0.000629877	0.00757842	-0.651709	Not-significant
COX10	-0.478254	-3.46955	0.000630185	0.00757842	-0.652152	Not-significant
ANGEL2	-0.406435	-3.46773	0.000634236	0.00761984	-0.657969	Not-significant
PIAS1	-0.433348	-3.46764	0.000634441	0.00761984	-0.658262	Not-significant
TMEM41B	-0.533078	-3.46739	0.000635009	0.00761984	-0.659073	Not-significant
TIMM9	-0.554805	-3.46729	0.000635218	0.00761984	-0.659373	Not-significant
ELSPBP1	0.196393	3.4671	0.000635659	0.00762036	-0.660003	Not-significant
TFPT	0.610819	3.46681	0.000636307	0.00762336	-0.660927	Not-significant
TTC14	-0.588405	-3.46635	0.000637325	0.00763079	-0.662378	Not-significant
GTF2A1L	0.187082	3.46573	0.000638734	0.00763965	-0.664383	Not-significant
RWDD4	-0.387492	-3.46567	0.000638861	0.00763965	-0.664563	Not-significant
VPS52	-0.50281	-3.46533	0.000639636	0.00764415	-0.665663	Not-significant
FAM222A	-0.419799	-3.46477	0.000640889	0.00765436	-0.66744	Not-significant
ADGRD2	0.194418	3.46378	0.000643116	0.00767617	-0.670587	Not-significant
TXNDC8	0.212253	3.4636	0.00064354	0.00767646	-0.671185	Not-significant
CCIN	0.189208	3.46334	0.000644116	0.00767856	-0.671998	Not-significant
CD36	-1.0427	-3.46303	0.000644812	0.00768207	-0.672977	Down-regulated
CETN1	-0.336953	-3.46216	0.000646789	0.00770084	-0.675755	Not-significant
IGBP1P1	-0.597705	-3.46118	0.000649029	0.00772167	-0.678892	Not-significant
DRAM2	-0.461577	-3.46104	0.000649344	0.00772167	-0.679333	Not-significant
ZNF564	-0.370667	-3.46053	0.000650516	0.00773082	-0.680969	Not-significant
TMEM97	-1.0297	-3.45987	0.000652025	0.00774396	-0.683072	Down-regulated
SLCO1B7	0.194809	3.45941	0.000653078	0.00774949	-0.684536	Not-significant
FAM174B	-0.810463	-3.45932	0.000653299	0.00774949	-0.684843	Not-significant
NEO1	-0.625175	-3.45912	0.00065374	0.00774993	-0.685455	Not-significant
VCPKMT	-0.409546	-3.45835	0.000655511	0.00776612	-0.687909	Not-significant
UPP2	0.194189	3.45807	0.000656178	0.00776923	-0.688833	Not-significant
OR2J3	0.192691	3.45626	0.000660342	0.00781371	-0.694573	Not-significant
COL4A5	-1.14661	-3.4558	0.000661417	0.00781384	-0.696048	Down-regulated
SIGLECL1	0.187915	3.45575	0.000661528	0.00781384	-0.696201	Not-significant
OR10J5	0.228529	3.45573	0.000661575	0.00781384	-0.696265	Not-significant
PNPLA7	-1.01116	-3.45549	0.000662144	0.00781574	-0.697045	Down-regulated
SF3B5	-0.48171	-3.45502	0.000663224	0.00782368	-0.698524	Not-significant
CUL4A	-0.438492	-3.45323	0.000667406	0.00786817	-0.704226	Not-significant
ZNF502	-0.351447	-3.45215	0.000669956	0.00789338	-0.707685	Not-significant
IER5L	0.898199	3.45056	0.000673707	0.0079327	-0.71275	Not-significant
NKX2-1	0.217492	3.44984	0.000675402	0.00794778	-0.71503	Not-significant
TUBB3	1.00604	3.44818	0.000679353	0.00798016	-0.72032	Up-regulated
CEP104	0.512729	3.44813	0.000679474	0.00798016	-0.720482	Not-significant
PROKR1	0.195396	3.44807	0.0006796	0.00798016	-0.72065	Not-significant
LMBRD1	-0.600358	-3.44798	0.000679818	0.00798016	-0.72094	Not-significant
PCDHGA12	0.19613	3.44757	0.000680805	0.00798686	-0.722256	Not-significant
RPF1	-0.510978	-3.44717	0.000681762	0.00799111	-0.72353	Not-significant
KRT86	0.458804	3.44694	0.000682294	0.00799111	-0.724239	Not-significant
SUSD6	-0.573567	-3.44689	0.000682417	0.00799111	-0.724401	Not-significant
FRG1	-0.470239	-3.44624	0.000683973	0.00800084	-0.726468	Not-significant
PPP4R3B	-0.411057	-3.4462	0.000684082	0.00800084	-0.726611	Not-significant
RPAIN	-0.465103	-3.44555	0.000685647	0.00801426	-0.728685	Not-significant
DNASE1L3	-0.851107	-3.44365	0.00069022	0.00806279	-0.734713	Not-significant
FGD6	0.436921	3.44339	0.000690846	0.0080652	-0.735535	Not-significant
RAD23B	-0.469808	-3.44297	0.000691855	0.00807207	-0.736859	Not-significant
LINC00427	0.155927	3.44196	0.000694325	0.00809595	-0.74009	Not-significant
PLEKHA5	-0.640383	-3.44089	0.000696913	0.0081212	-0.743465	Not-significant
SSTR1	-1.01344	-3.44013	0.000698765	0.00813784	-0.745871	Down-regulated
TCF15	0.246862	3.43949	0.000700343	0.0081491	-0.747916	Not-significant
SAMD13	-0.461953	-3.43939	0.000700582	0.0081491	-0.748226	Not-significant
EAF2	-0.720301	-3.43908	0.000701342	0.00815299	-0.749208	Not-significant
TG	0.219866	3.43792	0.000704207	0.00818134	-0.752905	Not-significant
KL	-0.570808	-3.43691	0.000706702	0.00820536	-0.756112	Not-significant
RNASE3	0.198901	3.43585	0.000709307	0.00823062	-0.759448	Not-significant
CFAP161	0.208041	3.43513	0.000711096	0.00824314	-0.761731	Not-significant
OR52N1	0.177986	3.4349	0.000711672	0.00824314	-0.762466	Not-significant
SOHLH1	0.292587	3.43477	0.000711995	0.00824314	-0.762876	Not-significant
CXCL14	-1.23441	-3.43445	0.000712799	0.00824314	-0.7639	Down-regulated
TMEM222	-0.50808	-3.43443	0.00071285	0.00824314	-0.763966	Not-significant
COL18A1-AS1	0.184362	3.43428	0.000713232	0.00824314	-0.76445	Not-significant
BLID	0.186998	3.43405	0.000713791	0.00824314	-0.765161	Not-significant
ADAMTSL2	0.800002	3.43404	0.000713824	0.00824314	-0.765203	Not-significant
DND1	0.192632	3.43367	0.00071475	0.00824887	-0.766378	Not-significant
FCN2	0.180366	3.43341	0.000715387	0.00824889	-0.767186	Not-significant
MT1E	-1.25781	-3.43325	0.000715784	0.00824889	-0.767689	Down-regulated
PARP2	-0.451584	-3.43315	0.000716042	0.00824889	-0.768015	Not-significant
AZGP1	-1.06502	-3.43278	0.000716964	0.00825017	-0.769183	Down-regulated
FXYD4	-0.657957	-3.43267	0.000717247	0.00825017	-0.769539	Not-significant
RWDD1	-0.482017	-3.43259	0.000717443	0.00825017	-0.769788	Not-significant
FCGBP	-2.14871	-3.4324	0.000717927	0.00825078	-0.770398	Down-regulated
HGFAC	0.20482	3.4321	0.000718668	0.00825436	-0.771334	Not-significant
PCNX3	-0.448479	-3.43185	0.000719307	0.00825675	-0.772139	Not-significant
XK	-0.908041	-3.43166	0.00071979	0.00825735	-0.772749	Down-regulated
CGNL1	-1.27049	-3.43148	0.00072022	0.00825735	-0.77329	Down-regulated
PXDNL	0.206723	3.4307	0.000722198	0.00827508	-0.775776	Not-significant
C17orf58	-0.488625	-3.43026	0.00072331	0.00828287	-0.77717	Not-significant
OXSM	-0.367328	-3.43006	0.000723815	0.00828371	-0.777803	Not-significant
FMC1	-0.439414	-3.42956	0.000725073	0.0082926	-0.779377	Not-significant
EPB41L4A-AS1	-0.665614	-3.4294	0.000725484	0.0082926	-0.77989	Not-significant
EAF1	-0.551786	-3.42924	0.000725889	0.0082926	-0.780396	Not-significant
FAM107B	-0.98388	-3.42833	0.000728194	0.00831398	-0.78327	Down-regulated
FARS2	-0.35665	-3.42763	0.000729985	0.00832948	-0.785497	Not-significant
KLF9	-0.871685	-3.42672	0.000732302	0.00834968	-0.788369	Not-significant
CALCR	0.189616	3.42659	0.000732627	0.00834968	-0.788771	Not-significant
GRIK4	0.179531	3.42593	0.000734328	0.0083631	-0.790873	Not-significant
LINC02914	0.155658	3.42579	0.000734676	0.0083631	-0.791303	Not-significant
H4C13	0.211234	3.42554	0.000735333	0.00836561	-0.792113	Not-significant
QRFP	0.177524	3.42514	0.000736341	0.00837211	-0.793354	Not-significant
MT1M	-1.46605	-3.4245	0.000738004	0.00838185	-0.795398	Down-regulated
ZNF451	-0.463654	-3.42447	0.000738071	0.00838185	-0.795482	Not-significant
AXDND1	-0.891389	-3.42384	0.000739685	0.0083952	-0.79746	Not-significant
OR6C76	0.166878	3.42166	0.000745339	0.00845437	-0.804361	Not-significant
FAM71E2	0.155223	3.42068	0.000747899	0.00846917	-0.807468	Not-significant
ZNF704	-0.61921	-3.42063	0.000748022	0.00846917	-0.807617	Not-significant
OR51G2	0.183292	3.42046	0.000748467	0.00846917	-0.808157	Not-significant
SERP1	-0.600615	-3.42043	0.000748527	0.00846917	-0.808229	Not-significant
RAD50	-0.373304	-3.42031	0.000748851	0.00846917	-0.808621	Not-significant
PLAA	-0.342661	-3.41959	0.000750726	0.00848537	-0.810887	Not-significant
ARL13A	0.175166	3.41915	0.000751892	0.00849355	-0.812294	Not-significant
POLR2A	-0.540663	-3.41879	0.000752837	0.00849646	-0.813432	Not-significant
LRRC37A2	0.201205	3.41871	0.000753036	0.00849646	-0.813671	Not-significant
CSNK2A2	-0.657578	-3.41822	0.000754325	0.008506	-0.815221	Not-significant
CYP2S1	-1.41091	-3.41739	0.000756499	0.0085255	-0.817828	Down-regulated
CYP2C9	-0.917086	-3.41702	0.00075749	0.00852887	-0.819014	Down-regulated
ANAPC7	0.350423	3.41686	0.000757909	0.00852887	-0.819515	Not-significant
IPCEF1	-0.432719	-3.41667	0.000758406	0.00852887	-0.820109	Not-significant
GTF2IRD2B	0.263853	3.41644	0.000759011	0.00852887	-0.820831	Not-significant
FAM120A	-0.386393	-3.41644	0.000759021	0.00852887	-0.820843	Not-significant
APOBEC4	0.207613	3.41601	0.000760154	0.00853536	-0.822195	Not-significant
EIF3J-DT	0.197623	3.41588	0.000760489	0.00853536	-0.822594	Not-significant
CDC42SE2	-0.590134	-3.41542	0.000761712	0.00854409	-0.82405	Not-significant
PCP4L1	0.188046	3.41492	0.000763042	0.00855401	-0.82563	Not-significant
OR10G9	0.183814	3.41418	0.000765016	0.00856907	-0.827971	Not-significant
GABRB2	0.18638	3.41408	0.000765279	0.00856907	-0.828283	Not-significant
MT1H	-1.77185	-3.41325	0.000767487	0.00858878	-0.830893	Down-regulated
ELOVL3	0.245391	3.41176	0.000771483	0.00862847	-0.835598	Not-significant
CCDC8	0.270179	3.41101	0.000773484	0.0086458	-0.837943	Not-significant
HNRNPK	-0.474622	-3.41047	0.000774954	0.00865719	-0.839664	Not-significant
OR52I1	0.219653	3.40948	0.000777617	0.0086799	-0.842771	Not-significant
ANKRD53	-0.214859	-3.40938	0.000777892	0.0086799	-0.843092	Not-significant
OR8K3	0.197161	3.40854	0.000780151	0.00870005	-0.845718	Not-significant
MZB1	-1.47595	-3.40824	0.000780966	0.00870407	-0.846663	Down-regulated
RASIP1	-0.903956	-3.40791	0.000781869	0.00870908	-0.84771	Down-regulated
SETDB2	-0.522033	-3.40743	0.00078318	0.00871862	-0.849228	Not-significant
NCOR1P1	-0.47013	-3.40714	0.000783956	0.0087222	-0.850125	Not-significant
RLBP1	0.221318	3.40677	0.000784976	0.00872848	-0.851302	Not-significant
MYL10	0.187412	3.40637	0.000786051	0.00873537	-0.852542	Not-significant
TMPRSS5	0.218757	3.40605	0.000786929	0.00874007	-0.853553	Not-significant
LSM11	0.300471	3.4054	0.000788702	0.00875468	-0.855591	Not-significant
SLC17A6	0.196965	3.40492	0.000790028	0.00876433	-0.857113	Not-significant
DCTN2	-0.341788	-3.40357	0.000793751	0.00880055	-0.861371	Not-significant
PIK3C3	-0.393305	-3.40258	0.000796488	0.00882578	-0.864487	Not-significant
GDPGP1	0.279218	3.40196	0.000798198	0.00883963	-0.86643	Not-significant
ZNF12	-0.376177	-3.40171	0.000798888	0.00884217	-0.867212	Not-significant
CCNK	-0.450105	-3.40118	0.000800352	0.00885326	-0.86887	Not-significant
ZNF382	0.200082	3.40092	0.000801072	0.00885611	-0.869684	Not-significant
SDK1	0.217873	3.4007	0.000801685	0.00885726	-0.870377	Not-significant
YES1	-0.611969	-3.40055	0.000802099	0.00885726	-0.870844	Not-significant
TMOD2	0.179285	3.40001	0.000803611	0.00886771	-0.87255	Not-significant
ACAN	0.726164	3.39988	0.00080397	0.00886771	-0.872954	Not-significant
PDLIM2	0.188393	3.39951	0.000805006	0.00887403	-0.87412	Not-significant
SPDEF	-1.3049	-3.39868	0.000807331	0.00889421	-0.876732	Down-regulated
ANGPT2	0.74009	3.39852	0.000807764	0.00889421	-0.877217	Not-significant
ARL1	-0.451939	-3.39724	0.000811358	0.00892798	-0.881236	Not-significant
DLX2	0.144107	3.39709	0.000811779	0.00892798	-0.881706	Not-significant
CCDC198	0.303847	3.3968	0.000812591	0.00892798	-0.882612	Not-significant
ELOVL6	-1.08212	-3.39675	0.000812755	0.00892798	-0.882794	Down-regulated
TMEM9B	-0.517309	-3.3966	0.000813158	0.00892798	-0.883242	Not-significant
LINC00943	0.185747	3.39602	0.000814804	0.00894094	-0.885074	Not-significant
PKD2L1	0.336147	3.39479	0.000818274	0.00897388	-0.888921	Not-significant
C18orf21	-0.474058	-3.39457	0.000818917	0.0089758	-0.889632	Not-significant
SLC6A18	0.239094	3.39322	0.000822729	0.00900758	-0.893837	Not-significant
CXCR2P1	0.200662	3.39322	0.000822756	0.00900758	-0.893866	Not-significant
NDUFB5	-0.418757	-3.39289	0.000823674	0.00900766	-0.894876	Not-significant
CREBRF	-0.635751	-3.39288	0.000823703	0.00900766	-0.894908	Not-significant
POLR2J	0.396493	3.39243	0.000825002	0.00901673	-0.896334	Not-significant
CYP2C8	-0.538828	-3.39216	0.000825754	0.00901981	-0.897159	Not-significant
PTOV1	-0.491286	-3.39187	0.000826596	0.00902387	-0.898082	Not-significant
PHETA1	-0.725226	-3.3914	0.000827943	0.00903343	-0.899556	Not-significant
CAST	-0.665142	-3.39114	0.000828684	0.00903638	-0.900365	Not-significant
CATSPER1	0.265842	3.39077	0.000829759	0.00904295	-0.901538	Not-significant
SPEM1	0.175598	3.38978	0.000832594	0.0090687	-0.904626	Not-significant
SLC16A4	0.42754	3.3892	0.000834279	0.0090819	-0.906456	Not-significant
ADNP2	-0.406051	-3.38892	0.000835075	0.00908453	-0.907319	Not-significant
EML5	0.163819	3.38879	0.000835468	0.00908453	-0.907745	Not-significant
MICALL2	-0.488839	-3.38824	0.000837056	0.00909664	-0.909464	Not-significant
COL18A1	0.944205	3.38777	0.000838414	0.00910624	-0.910932	Up-regulated
TMEM70	-0.464345	-3.38538	0.000845379	0.00917415	-0.918418	Not-significant
LPIN2	-0.672224	-3.38512	0.000846114	0.00917415	-0.919205	Not-significant
HNRNPA1	-0.52871	-3.38503	0.000846384	0.00917415	-0.919494	Not-significant
BCAS1	-1.60251	-3.38496	0.00084658	0.00917415	-0.919704	Down-regulated
NXF5	0.159746	3.38455	0.000847804	0.00918223	-0.921011	Not-significant
NEUROG1	0.184767	3.38341	0.000851152	0.00921329	-0.924578	Not-significant
NTSR2	0.158013	3.38278	0.000852997	0.00922805	-0.926537	Not-significant
LOC284009	0.169749	3.38189	0.00085563	0.00925132	-0.929327	Not-significant
IQCF1	0.187226	3.38133	0.000857269	0.00926382	-0.931058	Not-significant
KRTAP17-1	0.17707	3.38086	0.000858679	0.00927382	-0.932544	Not-significant
FXR2	-0.387112	-3.38051	0.000859704	0.00927743	-0.933624	Not-significant
PP2D1	0.224297	3.38042	0.00085998	0.00927743	-0.933915	Not-significant
FKBP7	0.228608	3.37931	0.000863262	0.00930761	-0.937362	Not-significant
FADS2	0.306451	3.37911	0.000863864	0.00930887	-0.937993	Not-significant
SDC4	-1.06999	-3.37853	0.000865615	0.0093225	-0.939825	Down-regulated
PDIA2	-1.50415	-3.37749	0.000868717	0.00935065	-0.943061	Down-regulated
OR6C68	0.207568	3.37719	0.000869603	0.00935493	-0.943983	Not-significant
DENND2D	-0.710383	-3.3763	0.000872281	0.00937607	-0.946765	Not-significant
JKAMP	-0.560866	-3.37619	0.00087263	0.00937607	-0.947127	Not-significant
ACSS2	-0.768617	-3.37605	0.000873033	0.00937607	-0.947545	Not-significant
B3GNTL1	0.283597	3.37539	0.000875039	0.00939234	-0.949621	Not-significant
F9	0.21976	3.37486	0.000876642	0.00940429	-0.951276	Not-significant
AMD1	-0.449519	-3.37454	0.000877606	0.00940937	-0.952271	Not-significant
HTR1E	-0.25015	-3.3741	0.000878942	0.0094155	-0.953648	Not-significant
PRR12	-0.188361	-3.37403	0.00087916	0.0094155	-0.953871	Not-significant
RNF141	-0.443759	-3.37382	0.000879786	0.00941695	-0.954516	Not-significant
INTS7	0.356252	3.3732	0.000881671	0.00943187	-0.956452	Not-significant
MANEA	-0.547503	-3.373	0.000882262	0.00943293	-0.957058	Not-significant
TGM5	0.196325	3.37251	0.000883757	0.00944364	-0.958589	Not-significant
MLYCD	-0.429092	-3.37224	0.000884581	0.00944719	-0.959432	Not-significant
MYH1	0.176962	3.37178	0.00088599	0.00945697	-0.960872	Not-significant
CFAP53	0.196405	3.37138	0.000887209	0.00946462	-0.962116	Not-significant
HP1BP3	0.277697	3.37122	0.000887694	0.00946462	-0.96261	Not-significant
RNF185	-0.291625	-3.37001	0.000891401	0.00949887	-0.96638	Not-significant
CPNE3	-0.532808	-3.36981	0.00089201	0.00950007	-0.966997	Not-significant
DLD	-0.635625	-3.36822	0.000896934	0.00954722	-0.971976	Not-significant
HIGD1A	-0.631028	-3.36775	0.000898377	0.00955315	-0.973431	Not-significant
DELEC1	0.16788	3.36771	0.000898487	0.00955315	-0.973541	Not-significant
PLG	0.232261	3.3667	0.000901626	0.00958121	-0.976695	Not-significant
RSPH14	0.2122	3.36647	0.000902338	0.00958347	-0.97741	Not-significant
C12orf54	0.192845	3.36595	0.000903947	0.00959524	-0.97902	Not-significant
YY1	-0.583392	-3.36574	0.000904608	0.00959695	-0.979681	Not-significant
TGFBR2	-0.685974	-3.36543	0.00090558	0.00960195	-0.980653	Not-significant
EFCAB13	0.169913	3.36463	0.000908088	0.00962167	-0.983154	Not-significant
BPIFA2	0.194569	3.36451	0.000908443	0.00962167	-0.983508	Not-significant
AAMDC	-0.601374	-3.36297	0.000913282	0.00966277	-0.988312	Not-significant
MYCBP2	-0.56748	-3.36295	0.000913331	0.00966277	-0.98836	Not-significant
SLC20A1-DT	0.283144	3.36217	0.000915781	0.00968335	-0.990783	Not-significant
ADI1	-0.72985	-3.36178	0.00091703	0.00969121	-0.992015	Not-significant
SMIM19	-0.457086	-3.36112	0.000919092	0.00970765	-0.994045	Not-significant
MTNR1A	0.17138	3.3608	0.000920104	0.00970842	-0.995041	Not-significant
OR8D2	0.197569	3.36073	0.000920341	0.00970842	-0.995274	Not-significant
ASAP3	-0.662693	-3.36062	0.000920683	0.00970842	-0.995609	Not-significant
PPIL2	0.205791	3.35921	0.00092517	0.00974544	-1.00001	Not-significant
FNBP4	-0.480808	-3.35913	0.000925394	0.00974544	-1.00022	Not-significant
AP3B1	-0.452303	-3.35903	0.000925718	0.00974544	-1.00054	Not-significant
AFF3	-0.865861	-3.35833	0.000927968	0.00976377	-1.00274	Not-significant
PTS	-0.516705	-3.35796	0.000929143	0.00976722	-1.00388	Not-significant
LINC01704	0.145282	3.35766	0.000930109	0.00976722	-1.00482	Not-significant
TPCN1	0.360851	3.35757	0.000930367	0.00976722	-1.00507	Not-significant
MT1G	-1.76607	-3.35756	0.000930403	0.00976722	-1.00511	Down-regulated
CCDC103	0.300368	3.35743	0.000930842	0.00976722	-1.00553	Not-significant
DMBX1	0.297552	3.35672	0.000933103	0.00978559	-1.00773	Not-significant
TMEM30B	-1.10883	-3.35559	0.000936743	0.0098184	-1.01124	Down-regulated
NLK	-0.523837	-3.35478	0.000939348	0.00984032	-1.01376	Not-significant
SLC11A1	0.851166	3.35438	0.000940627	0.00984834	-1.01498	Not-significant
CD3E	-0.711948	-3.35408	0.000941605	0.00985321	-1.01592	Not-significant
SENP6	-0.392918	-3.35373	0.000942738	0.00985968	-1.01701	Not-significant
FOXA1	-1.45003	-3.35324	0.000944307	0.00986371	-1.01852	Down-regulated
EFCAB3	0.217236	3.35298	0.000945157	0.00986371	-1.01933	Not-significant
COA3	-0.486332	-3.35294	0.000945301	0.00986371	-1.01947	Not-significant
FHIP2A	-0.433465	-3.35286	0.000945558	0.00986371	-1.01971	Not-significant
RPL31	-0.411954	-3.3528	0.000945741	0.00986371	-1.01989	Not-significant
H1-6	0.143629	3.35251	0.000946696	0.00986371	-1.0208	Not-significant
EWSR1	-0.40162	-3.3525	0.000946723	0.00986371	-1.02082	Not-significant
RPL37	-0.686613	-3.35148	0.000950031	0.0098928	-1.02398	Not-significant
SNORD36C	-0.493251	-3.35073	0.000952493	0.00991306	-1.02632	Not-significant
PAQR8	-0.974558	-3.35048	0.000953296	0.00991452	-1.02708	Down-regulated
CAPN8	-1.64031	-3.35037	0.000953667	0.00991452	-1.02743	Down-regulated
COL8A1	1.49935	3.34954	0.000956389	0.00993743	-1.03001	Up-regulated
SPINT4	0.215703	3.34921	0.000957473	0.0099433	-1.03103	Not-significant
GPX3	-1.05999	-3.34793	0.000961674	0.00998153	-1.03499	Down-regulated
ONECUT3	0.188097	3.34774	0.0009623	0.00998263	-1.03558	Not-significant
WDR83OS	-0.323585	-3.3467	0.000965739	0.0100128	-1.0388	Not-significant
SPP1	1.67683	3.34646	0.000966517	0.0100128	-1.03953	Up-regulated
SLC18A2	0.21233	3.34639	0.000966772	0.0100128	-1.03977	Not-significant
NME1-NME2	0.417781	3.34554	0.000969577	0.0100364	-1.04238	Not-significant
TBC1D5	0.206412	3.34521	0.000970669	0.0100423	-1.0434	Not-significant
CLYBL	-0.613031	-3.34393	0.000974938	0.0100755	-1.04737	Not-significant
APOO	-0.597497	-3.34371	0.000975675	0.0100755	-1.04805	Not-significant
GLYATL3	0.179451	3.34364	0.000975895	0.0100755	-1.04825	Not-significant
TMEM196	0.204196	3.34327	0.00097715	0.0100755	-1.04941	Not-significant
FBXO38	-0.409607	-3.34326	0.000977184	0.0100755	-1.04945	Not-significant
TOGARAM1	-0.44481	-3.34321	0.000977345	0.0100755	-1.04959	Not-significant
ZNF780A	0.174104	3.34301	0.000978022	0.0100755	-1.05022	Not-significant
TMEM263	-0.553748	-3.34289	0.000978419	0.0100755	-1.05059	Not-significant
DNAJB14	-0.445644	-3.34248	0.000979789	0.0100755	-1.05185	Not-significant
RPL5	-0.361173	-3.34238	0.000980109	0.0100755	-1.05215	Not-significant
KIDINS220	-0.61124	-3.34235	0.000980239	0.0100755	-1.05227	Not-significant
GPRIN1	0.270354	3.34234	0.000980274	0.0100755	-1.0523	Not-significant
TMBIM6	-0.584537	-3.34221	0.000980709	0.0100755	-1.0527	Not-significant
MYH2	0.189031	3.34158	0.000982822	0.0100918	-1.05464	Not-significant
CHD9	-0.491472	-3.34137	0.000983503	0.0100934	-1.05527	Not-significant
MTRNR2L1	-1.08673	-3.3411	0.000984432	0.0100975	-1.05612	Down-regulated
SLC30A6	0.237982	3.33988	0.00098853	0.0101342	-1.05988	Not-significant
KCNH5	0.177905	3.33869	0.000992588	0.0101703	-1.06358	Not-significant
STMN4	0.233166	3.33803	0.000994801	0.0101876	-1.06559	Not-significant
HOTAIR	0.395421	3.33699	0.00099837	0.0102186	-1.06882	Not-significant
MRPL55	-0.447682	-3.33614	0.00100125	0.0102426	-1.07143	Not-significant
SOX5	0.183681	3.3359	0.00100209	0.0102458	-1.07219	Not-significant
COPS2	-0.577421	-3.33554	0.00100333	0.010253	-1.0733	Not-significant
ZNF71	0.205754	3.33465	0.00100637	0.0102786	-1.07604	Not-significant
TBC1D10B	-0.400495	-3.33292	0.00101235	0.0103314	-1.08139	Not-significant
ACIN1	-0.417172	-3.33284	0.00101262	0.0103314	-1.08163	Not-significant
RIDA	-0.642974	-3.33201	0.00101548	0.0103498	-1.08418	Not-significant
GCM2	0.191394	3.33181	0.00101618	0.0103498	-1.0848	Not-significant
TEAD4	0.764283	3.33178	0.0010163	0.0103498	-1.08491	Not-significant
MFSD9	0.21387	3.3317	0.00101658	0.0103498	-1.08516	Not-significant
GBA2	-0.49654	-3.33047	0.00102083	0.0103876	-1.08892	Not-significant
OR12D3	0.183036	3.3297	0.00102355	0.0104097	-1.09132	Not-significant
LINC00919	0.163529	3.32915	0.00102545	0.0104235	-1.093	Not-significant
FMOD	-1.02001	-3.32819	0.00102881	0.0104471	-1.09595	Down-regulated
PMEPA1	1.04854	3.32818	0.00102886	0.0104471	-1.09599	Up-regulated
TP53I11	0.479873	3.32735	0.00103178	0.0104712	-1.09855	Not-significant
ECSIT	-0.369238	-3.32672	0.00103398	0.010488	-1.10048	Not-significant
BAIAP2	-0.772253	-3.32621	0.0010358	0.0105009	-1.10207	Not-significant
LRRC23	0.407739	3.32587	0.00103699	0.0105074	-1.10311	Not-significant
USP47	-0.490662	-3.3255	0.00103831	0.0105153	-1.10426	Not-significant
ELAC1	-0.250277	-3.32494	0.00104027	0.0105295	-1.10596	Not-significant
BSDC1	-0.428443	-3.32458	0.00104157	0.0105313	-1.10709	Not-significant
SMARCB1	-0.491936	-3.32436	0.00104235	0.0105313	-1.10776	Not-significant
VPS4B	-0.548279	-3.3243	0.00104255	0.0105313	-1.10793	Not-significant
KCNQ3	0.434732	3.32428	0.00104264	0.0105313	-1.10802	Not-significant
C22orf42	0.197357	3.32343	0.00104565	0.0105518	-1.11062	Not-significant
GTPBP10	0.305233	3.3234	0.00104577	0.0105518	-1.11072	Not-significant
ASMT	0.207262	3.32277	0.00104802	0.0105689	-1.11266	Not-significant
TREM2	0.428252	3.32208	0.00105049	0.0105831	-1.11479	Not-significant
DCSTAMP	0.308156	3.32207	0.00105053	0.0105831	-1.11482	Not-significant
ULK3	-0.310583	-3.32113	0.00105389	0.0106113	-1.1177	Not-significant
LINC02382	0.160772	3.32087	0.0010548	0.010615	-1.11848	Not-significant
METTL9	-0.415266	-3.32004	0.00105779	0.0106395	-1.12104	Not-significant
NARS1	-0.429373	-3.31957	0.00105949	0.010651	-1.12248	Not-significant
ZNF883	0.168151	3.31849	0.00106341	0.0106848	-1.12582	Not-significant
LCE1D	0.173239	3.31741	0.00106732	0.0107179	-1.12913	Not-significant
ETV4	0.878691	3.31721	0.00106803	0.0107179	-1.12973	Not-significant
ASCL3	0.148875	3.31712	0.00106838	0.0107179	-1.13003	Not-significant
NQO1	-1.27185	-3.31678	0.0010696	0.0107245	-1.13106	Down-regulated
LINC00898	0.179321	3.31662	0.00107019	0.0107248	-1.13156	Not-significant
CUX2	-0.3249	-3.3153	0.00107498	0.0107672	-1.13559	Not-significant
MAGEF1	0.471341	3.31502	0.00107604	0.0107708	-1.13648	Not-significant
SAR1B	-0.680216	-3.3149	0.00107646	0.0107708	-1.13683	Not-significant
ESM1	0.93639	3.31442	0.0010782	0.0107826	-1.13829	Up-regulated
ZDHHC7	-0.534881	-3.31421	0.001079	0.0107849	-1.13895	Not-significant
RBM23	-0.451417	-3.31206	0.00108691	0.0108583	-1.14555	Not-significant
ANG	-1.06888	-3.31151	0.00108893	0.0108727	-1.14723	Down-regulated
KRTAP13-1	0.187524	3.31136	0.00108948	0.0108727	-1.14769	Not-significant
REG3A	-2.7457	-3.31047	0.0010928	0.0109001	-1.15043	Down-regulated
SLC48A1	-0.494272	-3.31019	0.00109382	0.0109042	-1.15127	Not-significant
NTF4	0.18921	3.31005	0.00109434	0.0109042	-1.1517	Not-significant
C1orf87	0.212876	3.3093	0.00109713	0.0109263	-1.154	Not-significant
SCGB1D2	0.200276	3.30907	0.00109802	0.0109295	-1.15473	Not-significant
SPATA9	0.160617	3.30887	0.00109874	0.010931	-1.15532	Not-significant
PYGO1	0.209344	3.30794	0.00110221	0.0109598	-1.15817	Not-significant
KLHL24	-0.527351	-3.30765	0.00110331	0.010965	-1.15906	Not-significant
SYT12	0.194566	3.30693	0.00110602	0.0109863	-1.16128	Not-significant
NPY2R	0.180503	3.30602	0.00110945	0.0110146	-1.16407	Not-significant
KRT1	0.172554	3.30542	0.0011117	0.0110313	-1.16591	Not-significant
GCA	-0.574237	-3.30487	0.00111377	0.0110449	-1.16758	Not-significant
MMADHC	-0.530104	-3.30475	0.00111422	0.0110449	-1.16795	Not-significant
EEF1AKMT3	-0.54378	-3.30458	0.00111488	0.0110458	-1.16848	Not-significant
OR51L1	0.192113	3.30418	0.00111639	0.0110505	-1.1697	Not-significant
PILRB	0.167228	3.30415	0.00111652	0.0110505	-1.1698	Not-significant
ARL14	-1.50732	-3.30303	0.00112073	0.0110865	-1.1732	Down-regulated
NDUFS3	-0.374653	-3.30237	0.00112324	0.0110995	-1.17522	Not-significant
APPBP2	-0.45613	-3.3023	0.00112353	0.0110995	-1.17545	Not-significant
CTSB	0.69799	3.30223	0.00112378	0.0110995	-1.17565	Not-significant
FAM210B	-0.723361	-3.30112	0.00112802	0.0111357	-1.17905	Not-significant
FEM1A	-0.3597	-3.29998	0.00113239	0.0111662	-1.18254	Not-significant
GDPD4	-0.247381	-3.29992	0.00113264	0.0111662	-1.18274	Not-significant
MAGOH	0.437738	3.29986	0.00113287	0.0111662	-1.18292	Not-significant
BRINP3	0.262318	3.29971	0.00113344	0.0111662	-1.18337	Not-significant
AHNAK	-0.663106	-3.29907	0.00113591	0.0111848	-1.18534	Not-significant
SCGB2B2	0.147356	3.2989	0.00113655	0.0111854	-1.18585	Not-significant
SH2D1B	0.248182	3.29842	0.0011384	0.0111978	-1.18731	Not-significant
SLC25A11	-0.388252	-3.29812	0.00113955	0.0112033	-1.18822	Not-significant
RECQL4	0.559896	3.29773	0.00114105	0.0112123	-1.18941	Not-significant
COASY	-0.525639	-3.29668	0.00114514	0.0112423	-1.19264	Not-significant
UQCRB	-0.681241	-3.29649	0.00114586	0.0112423	-1.19321	Not-significant
HUNK	0.17905	3.29649	0.00114588	0.0112423	-1.19322	Not-significant
AJM1	0.1772	3.29632	0.00114651	0.0112423	-1.19372	Not-significant
SCARNA9	-0.858992	-3.29619	0.00114703	0.0112423	-1.19413	Not-significant
NKX3-2	1.0736	3.29601	0.00114774	0.0112435	-1.19469	Up-regulated
SS18L1	-0.461362	-3.29577	0.00114867	0.0112446	-1.19541	Not-significant
GPR150	0.198233	3.29552	0.00114962	0.0112446	-1.19616	Not-significant
CHST6	0.371011	3.29551	0.00114969	0.0112446	-1.19622	Not-significant
SPIN2A	0.186504	3.29538	0.00115019	0.0112446	-1.19661	Not-significant
RNLS	-0.63195	-3.29506	0.00115142	0.0112508	-1.19757	Not-significant
KCNC1	0.188002	3.29473	0.00115271	0.0112577	-1.19859	Not-significant
RIC1	0.163708	3.29389	0.00115599	0.0112827	-1.20115	Not-significant
PPARD	-0.460405	-3.29378	0.00115644	0.0112827	-1.2015	Not-significant
RORA	-0.474315	-3.29343	0.0011578	0.0112845	-1.20256	Not-significant
FBXO24	0.168434	3.29343	0.00115781	0.0112845	-1.20257	Not-significant
NPY4R	0.187485	3.29246	0.00116159	0.0113143	-1.20551	Not-significant
NOL9	0.427629	3.29235	0.00116204	0.0113143	-1.20585	Not-significant
CHSY3	0.599785	3.29201	0.00116339	0.0113216	-1.2069	Not-significant
CDKN2B-AS1	0.168354	3.29163	0.00116488	0.0113304	-1.20805	Not-significant
SAT2	-0.493755	-3.29064	0.00116876	0.0113598	-1.21106	Not-significant
ZNF835	0.174244	3.29055	0.00116913	0.0113598	-1.21134	Not-significant
ERVK13-1	-0.345559	-3.29041	0.00116968	0.0113598	-1.21176	Not-significant
IMPA2	-0.805584	-3.28959	0.00117295	0.0113824	-1.21428	Not-significant
FGF8	0.171085	3.28953	0.00117319	0.0113824	-1.21446	Not-significant
CLPX	-0.508523	-3.28893	0.00117557	0.0113997	-1.21629	Not-significant
MTURN	-0.912153	-3.28839	0.00117772	0.0114147	-1.21794	Down-regulated
LRRC55	0.18055	3.28764	0.00118068	0.0114373	-1.2202	Not-significant
RARS1	-0.426098	-3.2875	0.00118124	0.0114373	-1.22063	Not-significant
KIAA0754	0.155238	3.28656	0.00118501	0.0114605	-1.2235	Not-significant
VENTXP7	0.200045	3.28641	0.00118562	0.0114605	-1.22397	Not-significant
SIAH1	-0.354116	-3.28634	0.0011859	0.0114605	-1.22418	Not-significant
OR52B4	0.157384	3.28607	0.00118697	0.0114605	-1.22499	Not-significant
ZDHHC3	-0.516465	-3.28604	0.00118711	0.0114605	-1.2251	Not-significant
USP31	0.158777	3.28591	0.00118762	0.0114605	-1.22549	Not-significant
ETF1	-0.338467	-3.28573	0.00118835	0.0114605	-1.22604	Not-significant
CDH3	1.13142	3.28571	0.00118841	0.0114605	-1.22609	Up-regulated
VILL	-1.10936	-3.28551	0.00118921	0.0114624	-1.2267	Down-regulated
ESX1	0.182941	3.28437	0.00119381	0.0115004	-1.23018	Not-significant
NAGLU	-0.470765	-3.28414	0.00119471	0.0115004	-1.23086	Not-significant
FBXO41	0.190238	3.28402	0.00119521	0.0115004	-1.23123	Not-significant
MFAP3L	0.244271	3.28391	0.00119565	0.0115004	-1.23156	Not-significant
HOXB2	0.802942	3.28379	0.00119615	0.0115004	-1.23194	Not-significant
ARHGEF17-AS1	0.218366	3.28314	0.00119876	0.0115198	-1.23391	Not-significant
DEFB106A	0.173907	3.28278	0.00120025	0.0115255	-1.23502	Not-significant
PAK1	-0.563684	-3.2827	0.00120056	0.0115255	-1.23526	Not-significant
[truncated: 17,184 more rows]
